# Supplementary material for: Pigeon Circovirus over Three Decades of Research: Bibliometrics, Scoping Review, and Perspectives
Source: Viruses. 2022 Jul 8;14(7):1498. doi: 10.3390/v14071498 (PMC9317399; doi:10.3390/v14071498)
Supplement: Supplementary file 1 [file viruses-14-01498-s001.zip › viruses-1799092 resubmitted proof Supplemental Table S1.xlsx]

## Sheet: PiCV_WGS_371_MUSCLE_IDmatrix
Supplemental Table S1: Nucleotide pairwise identity analysis of the 371 PiCV whole genome sequences available from NCBI
	>KX108804_1_Pigeon_circovirus_strain_GF46_GuangDong_2014_complete_genome	>KX108786_1_Pigeon_circovirus_strain_G2798_GuangDong_2014_complete_genome	>KX108803_1_Pigeon_circovirus_strain_SF80_ShangHai_2014_complete_genome	>KX108802_1_Pigeon_circovirus_strain_GF81_GuangDong_2014_complete_genome	>KX108815_1_Pigeon_circovirus_strain_GF84_GuangDong_2014_complete_genome	>KX108794_1_Pigeon_circovirus_strain_SF85_Shanghai_2014_complete_genome	>KX108814_1_Pigeon_circovirus_strain_SF86_ShangHai_2014_complete_genome	>KX108792_1_Pigeon_circovirus_strain_GF103_Guangdong_2014_complete_genome	>KX108782_1_Pigeon_circovirus_strain_SF77_ShangHai_2014_complete_genome	>MF576432_1_Pigeon_circovirus_strain_PCV_FJ1729_complete_genome	>KX108822_1_UNVERIFIED_Pigeon_circovirus_strain_SF83_ShangHai_2014_complete_genome	>KX108808_1_UNVERIFIED_Pigeon_circovirus_strain_SF81_ShangHai_2014_complete_genome	>KX108801_1_UNVERIFIED_Pigeon_circovirus_strain_JF45_JiangSu_2014_complete_genome	>MW181925_1_Pigeon_circovirus_strain_TF1_SN_2016_complete_genome	>MW181929_1_Pigeon_circovirus_strain_TY1_SN_2016_complete_genome	>MW181970_1_Pigeon_circovirus_strain_DS1_GS_2018_complete_genome	>MW181965_1_Pigeon_circovirus_strain_QD3_SN_2018_complete_genome	>MF136692_1_Pigeon_circovirus_strain_PiCV_P17_AUS_complete_genome	>MF136691_1_Pigeon_circovirus_strain_PiCV_P15_AUS_complete_genome	>MF136687_1_Pigeon_circovirus_strain_PiCV_P11_AUS_complete_genome	>MF136682_1_Pigeon_circovirus_strain_PiCV_P05_AUS_complete_genome	>MF136680_1_Pigeon_circovirus_strain_PiCV_P02_AUS_complete_genome	>MF136684_1_Pigeon_circovirus_strain_PiCV_P08_AUS_complete_genome	>MF136686_1_Pigeon_circovirus_strain_PiCV_P10_AUS_complete_genome	>KF738871_1_Columbid_circovirus_isolate_PL89X_complete_genome	>KJ704804_1_UNVERIFIED_Columbid_circovirus_isolate_NJPK21_complete_genome	>KJ704801_1_UNVERIFIED_Columbid_circovirus_isolate_AHBZ_complete_genome	>KF738852_1_Columbid_circovirus_isolate_PL189_complete_genome	>KF738851_1_Columbid_circovirus_isolate_PL188_complete_genome	>KF738853_1_Columbid_circovirus_isolate_PL197_complete_genome	>NC_002361_1_Columbid_circovirus_CoCV_complete_genome	>AF252610_1_Columbid_circovirus_CoCV_complete_genome	>KF738868_1_Columbid_circovirus_isolate_PL67_complete_genome	>DQ915960_1_Columbid_circovirus_isolate_Fra_A40042_complete_genome	>KF738861_1_Columbid_circovirus_isolate_PL57_complete_genome	>KJ704805_1_UNVERIFIED_Columbid_circovirus_isolate_SDDZ_complete_genome	>AJ298229_1_Columbid_circovirus_complete_genome_isolate_9030	>KF738859_1_Columbid_circovirus_isolate_PL48_complete_genome	>KX108795_1_Pigeon_circovirus_strain_JF2_JiangSu_2014_complete_genome	>KX108789_1_Pigeon_circovirus_strain_GF64_ShangHai_2014_complete_genome	>KF738848_1_Columbid_circovirus_isolate_PL170_complete_genome	>DQ915962_1_Columbid_circovirus_isolate_US_002180_complete_genome	>DQ915961_1_Columbid_circovirus_isolate_US_93A_complete_genome	>MW181990_1_Pigeon_circovirus_strain_QD7_SN_2019_complete_genome	>MW181988_1_Pigeon_circovirus_strain_LH2_HE_2019_complete_genome	>KF738845_1_Columbid_circovirus_isolate_PL124_complete_genome	>AJ298230_1_Columbid_circovirus_complete_genome_isolate_7050	>KF738872_1_Columbid_circovirus_isolate_PL94_complete_genome	>KX108819_1_UNVERIFIED_Pigeon_circovirus_strain_AF100_AnHui_2014_complete_genome
>KX108804_1_Pigeon_circovirus_strain_GF46_GuangDong_2014_complete_genome	100.001
>KX108786_1_Pigeon_circovirus_strain_G2798_GuangDong_2014_complete_genome	96.201	100.001
>KX108803_1_Pigeon_circovirus_strain_SF80_ShangHai_2014_complete_genome	95.901	97.401	100.001
>KX108802_1_Pigeon_circovirus_strain_GF81_GuangDong_2014_complete_genome	95.801	97.301	99.601	100.001
>KX108815_1_Pigeon_circovirus_strain_GF84_GuangDong_2014_complete_genome	95.601	96.601	96.901	96.801	100.001
>KX108794_1_Pigeon_circovirus_strain_SF85_Shanghai_2014_complete_genome	95.401	96.101	96.601	96.501	99.401	100.001
>KX108814_1_Pigeon_circovirus_strain_SF86_ShangHai_2014_complete_genome	94.401	95.601	96.401	96.601	95.901	96.101	100.001
>KX108792_1_Pigeon_circovirus_strain_GF103_Guangdong_2014_complete_genome	94.601	95.801	96.301	96.501	96.401	96.601	99.101	100.001
>KX108782_1_Pigeon_circovirus_strain_SF77_ShangHai_2014_complete_genome	94.601	95.701	96.301	96.401	96.301	96.501	99.001	99.801	100.001
>MF576432_1_Pigeon_circovirus_strain_PCV_FJ1729_complete_genome	94.601	96.401	95.301	95.101	96.101	95.801	95.501	95.901	95.801	100.001
>KX108822_1_UNVERIFIED_Pigeon_circovirus_strain_SF83_ShangHai_2014_complete_genome	96.601	97.701	97.601	97.601	97.201	96.801	96.201	96.301	96.201	96.201	100.001
>KX108808_1_UNVERIFIED_Pigeon_circovirus_strain_SF81_ShangHai_2014_complete_genome	95.201	96.701	96.201	96.101	95.901	95.501	95.201	95.301	95.201	95.501	97.301	100.001
>KX108801_1_UNVERIFIED_Pigeon_circovirus_strain_JF45_JiangSu_2014_complete_genome	95.701	97.201	97.001	97.001	96.301	95.901	95.501	95.701	95.701	95.701	98.201	96.201	100.001
>MW181925_1_Pigeon_circovirus_strain_TF1_SN_2016_complete_genome	94.601	95.901	95.501	95.601	95.601	95.101	94.801	95.001	95.001	94.901	97.301	95.701	97.601	100.001
>MW181929_1_Pigeon_circovirus_strain_TY1_SN_2016_complete_genome	94.601	95.501	95.501	95.501	94.701	94.601	94.501	95.001	94.901	94.301	96.901	94.901	97.301	96.601	100.001
>MW181970_1_Pigeon_circovirus_strain_DS1_GS_2018_complete_genome	95.101	96.101	95.701	95.701	95.601	95.301	95.001	95.401	95.301	95.201	97.301	95.701	97.301	96.701	96.001	100.001
>MW181965_1_Pigeon_circovirus_strain_QD3_SN_2018_complete_genome	94.201	94.601	94.501	94.501	94.201	94.301	94.301	94.601	94.501	93.101	95.401	94.201	95.301	95.201	94.701	94.901	100.001
>MF136692_1_Pigeon_circovirus_strain_PiCV_P17_AUS_complete_genome	92.901	94.201	94.001	94.201	93.401	93.301	93.401	93.701	93.801	93.201	95.001	93.601	94.701	93.901	94.401	93.601	93.501	100.001
>MF136691_1_Pigeon_circovirus_strain_PiCV_P15_AUS_complete_genome	92.901	94.101	94.101	94.101	93.701	93.701	93.701	93.901	93.901	93.101	94.901	93.501	94.701	93.701	94.301	93.901	93.701	97.701	100.001
>MF136687_1_Pigeon_circovirus_strain_PiCV_P11_AUS_complete_genome	92.901	94.101	94.101	94.101	93.701	93.601	93.601	93.801	93.801	93.001	94.901	93.401	94.701	93.801	94.301	93.801	93.601	97.801	99.601	100.001
>MF136682_1_Pigeon_circovirus_strain_PiCV_P05_AUS_complete_genome	93.001	94.101	94.101	94.101	93.701	93.601	93.701	93.901	93.801	93.001	95.001	93.501	94.801	93.801	94.401	93.801	93.701	97.901	99.701	99.901	100.001
>MF136680_1_Pigeon_circovirus_strain_PiCV_P02_AUS_complete_genome	93.001	94.201	94.201	94.201	93.801	93.701	93.701	93.901	93.901	93.101	95.001	93.501	94.801	93.901	94.401	93.901	93.701	97.901	99.701	99.901	100.001	100.001
>MF136684_1_Pigeon_circovirus_strain_PiCV_P08_AUS_complete_genome	92.901	94.101	94.101	94.101	93.701	93.601	93.601	93.801	93.801	93.101	94.901	93.401	94.701	93.801	94.401	93.901	93.601	97.801	99.601	99.801	99.901	99.901	100.001
>MF136686_1_Pigeon_circovirus_strain_PiCV_P10_AUS_complete_genome	93.101	94.301	94.301	94.301	93.901	93.801	93.801	94.001	94.001	93.201	95.101	93.601	94.901	94.001	94.501	94.001	93.801	97.801	99.601	99.801	99.901	99.901	99.801	100.001
>KF738871_1_Columbid_circovirus_isolate_PL89X_complete_genome	93.801	94.901	94.901	95.001	94.801	94.601	93.901	94.001	93.901	93.501	96.501	94.901	95.701	95.301	94.201	94.801	93.801	93.101	93.201	93.201	93.201	93.301	93.201	93.401	100.001
>KJ704804_1_UNVERIFIED_Columbid_circovirus_isolate_NJPK21_complete_genome	93.701	94.501	94.401	94.501	94.501	94.101	93.301	93.501	93.501	93.301	95.901	94.601	95.201	94.901	93.601	94.301	93.401	92.301	92.201	92.201	92.301	92.301	92.201	92.401	95.701	100.001
>KJ704801_1_UNVERIFIED_Columbid_circovirus_isolate_AHBZ_complete_genome	92.601	93.701	93.501	93.601	93.701	93.301	92.301	92.601	92.501	92.401	94.901	93.701	94.201	93.901	92.701	93.401	92.401	91.501	91.401	91.401	91.401	91.501	91.401	91.601	94.701	97.601	100.001
>KF738852_1_Columbid_circovirus_isolate_PL189_complete_genome	94.201	95.101	95.201	95.301	95.001	94.601	94.001	94.001	94.001	93.901	96.701	95.301	95.701	95.401	94.001	94.901	93.901	92.901	92.901	92.901	93.001	93.001	92.901	93.101	96.701	95.601	94.701	100.001
>KF738851_1_Columbid_circovirus_isolate_PL188_complete_genome	94.301	95.301	95.301	95.401	95.201	94.801	94.201	94.201	94.101	94.001	96.801	95.401	95.901	95.501	94.201	94.901	94.101	93.101	93.101	93.101	93.101	93.201	93.101	93.301	96.801	95.701	94.901	99.601	100.001
>KF738853_1_Columbid_circovirus_isolate_PL197_complete_genome	93.401	94.401	94.401	94.501	94.101	93.701	93.201	93.101	93.101	93.001	95.601	94.201	94.701	94.201	93.001	94.001	93.301	91.801	91.801	91.801	91.901	91.901	91.801	92.001	95.001	94.101	93.201	96.801	97.001	100.001
>NC_002361_1_Columbid_circovirus_CoCV_complete_genome	95.101	96.501	96.501	96.601	96.301	95.901	94.901	94.901	94.901	95.001	97.901	96.301	97.101	96.801	95.701	96.001	94.801	94.101	94.001	94.001	94.101	94.101	94.001	94.201	97.301	96.601	95.701	97.301	97.401	96.001	100.001
>AF252610_1_Columbid_circovirus_CoCV_complete_genome	95.101	96.501	96.501	96.601	96.301	95.901	94.901	94.901	94.901	95.001	97.901	96.301	97.101	96.801	95.701	96.001	94.801	94.101	94.001	94.001	94.101	94.101	94.001	94.201	97.301	96.601	95.701	97.301	97.401	96.001	100.001	100.001
>KF738868_1_Columbid_circovirus_isolate_PL67_complete_genome	95.101	96.301	96.101	96.201	96.101	95.701	95.101	95.201	95.201	95.001	97.701	96.201	96.801	96.501	95.101	95.901	94.901	94.101	94.101	94.101	94.201	94.201	94.101	94.301	97.301	96.801	95.801	97.301	97.501	96.201	98.201	98.201	100.001
>DQ915960_1_Columbid_circovirus_isolate_Fra_A40042_complete_genome	94.701	96.501	96.401	96.501	95.701	95.201	95.101	95.301	95.201	94.901	97.301	95.801	96.901	96.101	95.501	96.501	94.601	94.101	94.101	94.101	94.201	94.201	94.101	94.301	96.501	95.801	94.801	96.401	96.501	95.201	97.801	97.801	97.601	100.001
>KF738861_1_Columbid_circovirus_isolate_PL57_complete_genome	94.201	95.801	95.601	95.701	95.801	95.301	94.701	94.801	94.801	94.501	96.801	95.001	96.101	95.401	94.301	95.201	94.301	93.301	93.701	93.601	93.701	93.701	93.601	93.801	96.101	95.201	94.301	96.101	96.401	95.001	97.101	97.101	97.101	96.801	100.001
>KJ704805_1_UNVERIFIED_Columbid_circovirus_isolate_SDDZ_complete_genome	93.901	95.101	95.301	95.401	94.901	94.501	93.801	93.801	93.801	93.601	96.801	95.201	96.101	95.601	94.301	95.101	94.101	93.201	93.101	93.101	93.201	93.201	93.101	93.301	96.301	96.101	95.301	96.101	96.201	94.701	97.001	97.001	96.901	96.101	95.701	100.001
>AJ298229_1_Columbid_circovirus_complete_genome_isolate_9030	94.701	95.901	96.101	96.201	95.701	95.301	94.601	94.601	94.601	94.401	97.601	96.101	96.901	96.401	95.001	95.901	94.801	94.001	94.001	94.001	94.001	94.101	94.001	94.201	97.001	96.001	95.101	96.901	97.001	95.501	97.701	97.701	97.701	96.801	96.501	99.201	100.001
>KF738859_1_Columbid_circovirus_isolate_PL48_complete_genome	94.501	95.801	95.701	95.601	95.401	95.001	94.101	94.201	94.201	94.401	96.901	95.801	95.901	95.401	94.501	95.101	93.901	93.401	93.401	93.401	93.401	93.501	93.501	93.601	95.301	94.501	93.601	95.501	95.701	94.501	96.301	96.301	96.501	95.301	95.101	95.901	96.701	100.001
>KX108795_1_Pigeon_circovirus_strain_JF2_JiangSu_2014_complete_genome	94.301	95.801	96.001	95.901	95.401	95.401	94.501	94.401	94.301	94.501	96.901	95.801	95.801	95.201	94.701	95.101	93.901	93.501	93.701	93.701	93.801	93.801	93.701	93.901	94.201	93.601	92.701	94.701	94.801	93.701	95.701	95.701	95.401	95.201	95.101	95.101	96.001	95.601	100.001
>KX108789_1_Pigeon_circovirus_strain_GF64_ShangHai_2014_complete_genome	94.801	95.801	96.101	96.001	95.401	95.301	94.601	94.201	94.101	94.201	96.501	95.701	95.401	94.401	93.901	94.601	93.401	93.001	93.101	93.001	93.101	93.101	93.001	93.201	94.201	93.501	92.601	94.401	94.501	93.801	95.401	95.401	95.601	95.101	95.001	95.001	95.801	95.501	97.501	100.001
>KF738848_1_Columbid_circovirus_isolate_PL170_complete_genome	94.301	95.801	95.801	95.701	95.301	95.101	93.901	93.901	93.801	94.001	96.501	95.101	95.301	94.501	94.001	94.501	93.501	93.401	93.301	93.201	93.201	93.301	93.201	93.401	94.101	93.401	92.501	94.501	94.701	93.701	95.201	95.201	95.301	94.701	95.201	94.901	95.801	95.601	96.201	96.201	100.001
>DQ915962_1_Columbid_circovirus_isolate_US_002180_complete_genome	94.501	95.901	95.401	95.301	95.501	95.001	93.701	93.901	93.801	94.201	96.401	95.701	95.801	94.601	94.201	94.801	93.701	92.901	93.201	93.001	93.101	93.101	93.001	93.201	94.201	93.801	92.901	94.301	94.501	93.401	95.501	95.501	95.401	95.401	95.201	94.701	95.501	95.601	95.701	95.601	95.301	100.001
>DQ915961_1_Columbid_circovirus_isolate_US_93A_complete_genome	94.501	95.901	95.401	95.301	95.501	95.001	93.701	93.901	93.801	94.201	96.401	95.701	95.801	94.601	94.201	94.801	93.701	92.901	93.201	93.001	93.101	93.101	93.001	93.201	94.201	93.801	92.901	94.301	94.501	93.401	95.501	95.501	95.401	95.401	95.201	94.701	95.501	95.601	95.701	95.601	95.301	100.001	100.001
>MW181990_1_Pigeon_circovirus_strain_QD7_SN_2019_complete_genome	94.701	95.601	95.301	95.201	94.801	94.601	93.401	93.601	93.501	93.301	96.001	95.401	95.501	94.301	93.801	94.601	93.101	92.701	92.801	92.701	92.701	92.801	92.701	92.901	93.701	92.901	92.001	93.801	93.901	93.001	94.901	94.901	94.801	94.601	94.301	94.201	95.001	95.301	95.701	95.801	95.701	96.301	96.301	100.001
>MW181988_1_Pigeon_circovirus_strain_LH2_HE_2019_complete_genome	94.701	95.601	95.301	95.201	94.801	94.601	93.401	93.601	93.501	93.301	96.001	95.401	95.501	94.301	93.801	94.601	93.101	92.701	92.801	92.701	92.701	92.801	92.701	92.901	93.701	92.901	92.001	93.801	93.901	93.001	94.901	94.901	94.801	94.601	94.301	94.201	95.001	95.301	95.701	95.801	95.701	96.301	96.301	100.001	100.001
>KF738845_1_Columbid_circovirus_isolate_PL124_complete_genome	94.401	95.701	95.401	95.301	94.901	94.601	93.801	93.901	93.801	93.601	96.601	95.801	95.601	94.701	94.401	94.701	93.401	93.201	93.601	93.601	93.701	93.701	93.601	93.801	94.801	93.801	92.901	94.901	95.001	94.001	95.801	95.801	95.701	95.201	94.901	95.301	96.101	96.101	95.501	95.401	95.301	95.901	95.901	95.701	95.701	100.001
>AJ298230_1_Columbid_circovirus_complete_genome_isolate_7050	94.601	96.201	95.601	95.501	95.201	94.801	94.401	94.501	94.501	94.401	96.901	95.701	95.901	95.401	94.601	95.201	94.401	93.801	94.001	94.001	94.001	94.101	94.001	94.201	94.701	94.101	93.201	94.801	94.901	94.101	95.801	95.801	95.701	95.401	95.401	95.701	96.601	96.301	96.001	95.801	96.001	96.101	96.101	95.501	95.501	96.001	100.001
>KF738872_1_Columbid_circovirus_isolate_PL94_complete_genome	94.201	95.201	95.201	95.201	94.601	94.301	93.701	93.801	93.701	93.601	96.301	95.501	95.301	94.601	94.101	94.801	93.301	92.901	93.001	93.001	93.001	93.101	93.001	93.201	94.601	93.701	92.801	94.701	95.001	93.601	95.501	95.501	95.401	95.301	94.301	95.301	96.201	95.601	95.401	95.201	95.401	94.801	94.801	94.801	94.801	95.101	95.301	100.001
>KX108819_1_UNVERIFIED_Pigeon_circovirus_strain_AF100_AnHui_2014_complete_genome	95.801	96.901	97.501	97.401	96.501	96.101	95.101	95.001	94.901	95.201	98.301	97.001	97.101	95.901	96.001	96.101	94.701	94.601	94.601	94.601	94.601	94.701	94.601	94.801	95.601	95.001	94.101	95.801	96.001	94.901	97.201	97.201	97.001	96.701	96.101	96.301	97.201	96.601	97.301	97.201	96.501	96.401	96.401	96.201	96.201	96.601	96.601	96.001	100.001
>KX108824_1_UNVERIFIED_Pigeon_circovirus_strain_AF104_AnHui_2014_complete_genome	95.801	96.801	96.501	96.401	95.901	95.501	94.501	94.401	94.401	94.601	97.501	97.001	96.501	95.301	94.901	95.701	94.001	93.501	93.601	93.601	93.701	93.701	93.601	93.801	94.901	94.501	93.501	95.001	95.101	94.401	96.301	96.301	96.001	95.901	95.501	95.701	96.501	96.201	96.601	96.501	95.601	96.101	96.101	95.701	95.701	96.101	96.301	95.601	97.801
>KF738870_1_Columbid_circovirus_isolate_PL89_complete_genome	93.401	94.901	94.601	94.701	93.501	93.201	93.101	93.201	93.101	93.401	95.601	94.401	94.801	94.301	94.201	94.201	93.401	94.201	94.001	94.001	94.101	94.101	94.001	94.201	93.601	93.001	92.001	93.401	93.601	92.601	94.601	94.601	94.801	94.601	93.801	94.101	94.901	94.401	94.701	94.201	94.101	94.401	94.401	93.901	93.901	94.501	95.201	94.201	95.401
>KF738866_1_Columbid_circovirus_isolate_PL66A_complete_genome	93.501	95.001	94.601	94.701	93.601	93.201	93.201	93.301	93.201	93.401	95.601	94.401	94.801	94.301	94.201	94.301	93.501	94.301	94.101	94.101	94.101	94.201	94.101	94.301	93.601	93.001	92.001	93.401	93.601	92.501	94.601	94.601	94.801	94.601	94.001	94.101	94.901	94.401	94.801	94.201	94.301	94.401	94.401	93.801	93.801	94.401	95.301	94.201	95.501
>MW181945_1_Pigeon_circovirus_strain_WQ3_SN_2018_complete_genome	92.901	93.601	93.701	93.701	93.101	92.901	92.401	92.501	92.401	92.201	94.701	93.301	93.901	93.201	92.901	93.701	92.201	91.801	92.101	92.201	92.201	92.301	92.201	92.401	92.701	92.001	91.001	92.201	92.301	91.401	93.901	93.901	93.601	93.301	92.601	93.001	93.901	93.401	93.701	93.101	92.901	93.501	93.501	93.001	93.001	93.401	93.901	93.201	94.301
>KF738860_1_Columbid_circovirus_isolate_PL53_complete_genome	90.901	91.401	92.001	92.001	91.001	91.101	90.901	91.001	90.901	89.901	91.501	91.201	91.201	90.301	90.901	90.801	90.401	90.301	90.701	90.601	90.701	90.701	90.601	90.801	89.601	89.001	88.201	89.701	90.001	89.201	90.801	90.801	90.801	91.001	90.301	90.101	90.901	90.301	91.001	90.901	90.801	90.701	90.701	90.801	90.801	90.301	90.901	90.701	92.001
>HQ738642_1_Circovirus_NGchicken38_NGA_2009_isolate_NGchicken38_complete_genome	91.301	92.201	92.101	92.101	91.701	91.601	91.101	91.301	91.301	90.701	93.101	91.901	92.401	91.401	91.901	91.901	91.901	91.301	91.701	91.601	91.701	91.701	91.701	91.801	91.201	90.301	89.301	90.901	91.201	90.101	92.101	92.101	92.101	91.901	91.101	91.601	92.401	92.301	92.101	91.701	91.401	92.401	92.401	92.001	92.001	92.401	92.701	93.101	92.801
>KY688190_1_Columbid_circovirus_isolate_JL_replicationassociated_protein_rep_gene_complete_cds	91.501	91.801	92.101	92.001	91.801	92.101	91.501	91.501	91.401	90.401	92.601	91.801	91.701	90.601	90.601	91.201	91.901	89.801	90.301	90.201	90.201	90.301	90.201	90.401	90.401	89.401	88.701	90.401	90.401	90.301	91.501	91.501	91.401	91.501	91.201	90.701	91.401	91.501	93.001	93.301	91.901	91.701	91.701	91.701	91.701	91.601	92.101	91.401	92.901
>KF738869_1_Columbid_circovirus_isolate_PL7_complete_genome	93.901	95.301	94.901	94.801	94.301	94.001	93.201	93.301	93.201	93.501	96.201	95.301	95.101	94.401	94.301	94.201	93.101	93.801	93.601	93.501	93.501	93.601	93.501	93.701	94.301	93.301	92.301	94.501	94.601	93.001	95.301	95.301	95.101	94.701	94.301	94.701	95.501	95.201	95.001	94.801	95.001	95.301	95.301	95.101	95.101	96.601	95.401	95.101	96.201
>KF738865_1_Columbid_circovirus_isolate_PL63_complete_genome	93.301	94.101	93.901	93.801	93.201	92.901	92.001	92.201	92.101	92.201	95.001	94.001	94.001	93.201	93.101	93.101	92.901	92.501	92.301	92.201	92.301	92.301	92.201	92.401	93.001	92.101	91.101	93.001	93.301	91.901	94.101	94.101	93.801	93.401	93.501	94.001	94.901	94.101	93.801	93.601	93.901	94.401	94.401	94.001	94.001	95.401	94.401	94.201	95.001
>KF738846_1_Columbid_circovirus_isolate_PL13_complete_genome	93.101	94.201	93.901	93.801	93.201	92.901	92.001	92.101	92.001	92.301	94.901	94.001	93.901	93.201	93.201	93.101	92.901	92.701	92.501	92.401	92.501	92.501	92.401	92.601	93.001	92.001	91.001	93.201	93.401	92.101	94.101	94.101	94.001	93.401	93.501	94.101	95.001	94.201	93.801	93.701	93.901	94.201	94.201	93.801	93.801	95.601	94.401	94.301	95.001
>KF738864_1_Columbid_circovirus_isolate_PL62_complete_genome	92.901	94.001	93.701	93.601	92.901	92.601	92.001	92.101	92.001	92.101	94.801	94.001	93.901	93.101	93.001	92.901	92.701	92.401	92.201	92.101	92.201	92.201	92.101	92.301	93.001	91.801	91.001	93.201	93.401	92.001	94.101	94.101	93.801	93.201	93.501	94.101	95.001	94.101	93.701	93.601	94.301	94.801	94.801	93.601	93.601	95.201	94.501	94.301	94.901
>KF738863_1_Columbid_circovirus_isolate_PL60_complete_genome	92.801	93.901	93.601	93.501	92.801	92.501	91.901	92.001	91.901	92.101	94.701	93.901	93.801	93.101	93.001	92.801	92.701	92.501	92.301	92.201	92.201	92.301	92.201	92.401	93.001	91.801	90.901	93.101	93.201	92.001	94.001	94.001	93.701	93.201	93.201	94.101	94.901	94.001	93.601	93.601	94.101	94.801	94.801	93.701	93.701	95.301	94.501	94.401	94.801
>KF738862_1_Columbid_circovirus_isolate_PL58_complete_genome	93.001	94.101	93.801	93.701	93.001	92.701	92.101	92.201	92.101	92.301	94.901	94.101	94.001	93.301	93.201	93.001	93.001	92.701	92.501	92.401	92.401	92.501	92.401	92.601	93.201	92.001	91.101	93.401	93.501	92.301	94.201	94.201	93.901	93.401	93.501	94.401	95.201	94.301	93.801	93.801	94.001	95.001	95.001	93.901	93.901	95.501	94.701	94.301	95.001
>KF738856_1_Columbid_circovirus_isolate_PL43_complete_genome	93.001	94.101	93.801	93.701	93.101	92.801	92.101	92.201	92.101	92.301	95.001	94.201	94.001	93.301	93.301	93.001	92.901	92.601	92.401	92.301	92.301	92.401	92.301	92.501	93.201	92.001	91.101	93.401	93.501	92.301	94.201	94.201	93.901	93.401	93.501	94.301	95.101	94.301	93.901	93.901	94.001	95.101	95.101	94.001	94.001	95.601	94.601	94.301	95.101
>MW656152_1_Pigeon_circovirus_isolate_TSP7_2_complete_genome	91.301	92.301	92.701	92.801	91.901	91.501	91.101	91.301	91.301	90.901	92.701	92.001	92.401	91.201	91.201	91.501	90.101	90.801	90.301	90.301	90.301	90.401	90.301	90.501	91.001	90.501	89.601	91.001	91.101	89.901	91.801	91.801	92.101	91.401	91.201	91.501	92.301	92.101	92.001	92.301	91.801	91.901	91.901	91.201	91.201	91.901	92.301	91.601	93.101
>MW656076_1_Pigeon_circovirus_isolate_TSP15_5_complete_genome	93.701	94.701	94.801	94.601	94.301	93.901	92.901	93.201	93.201	93.201	95.401	94.601	94.601	93.901	93.901	94.001	92.801	92.801	93.101	93.001	93.101	93.101	93.001	93.201	93.901	93.201	92.301	93.801	93.901	92.701	94.801	94.801	95.101	94.401	93.801	94.301	95.101	95.001	94.401	94.401	94.301	94.601	94.601	93.801	93.801	94.401	95.001	94.301	95.701
>MW656078_1_Pigeon_circovirus_isolate_TSP15_7_complete_genome	93.901	94.901	95.101	94.901	94.701	94.301	93.201	93.401	93.401	93.401	95.801	94.801	94.901	94.401	94.101	94.201	93.001	92.901	93.101	93.101	93.201	93.201	93.101	93.301	94.201	93.401	92.501	94.001	94.101	93.001	95.201	95.201	95.501	94.601	93.901	94.801	95.701	95.501	94.601	94.601	94.401	94.401	94.401	93.901	93.901	94.901	95.001	94.501	96.101
>MW656119_1_Pigeon_circovirus_isolate_TSPSwab16_4_complete_genome	93.801	94.901	95.001	94.801	94.601	94.201	93.201	93.401	93.401	93.401	95.701	94.701	94.801	94.201	94.001	94.101	92.901	92.901	93.201	93.201	93.201	93.301	93.201	93.401	94.001	93.201	92.201	93.901	94.001	92.801	95.001	95.001	95.201	94.501	94.101	94.601	95.401	95.201	94.801	94.701	94.501	94.601	94.601	93.901	93.901	94.601	95.101	94.401	96.001
>MW656109_1_Pigeon_circovirus_isolate_TSPSwab2_2_complete_genome	93.101	94.801	94.701	94.501	93.801	93.301	92.801	93.101	93.101	93.201	95.101	94.201	94.601	93.701	93.901	93.701	92.901	93.401	93.801	93.701	93.801	93.801	93.701	93.901	93.201	92.301	91.401	93.001	93.101	92.001	94.301	94.301	94.201	94.401	93.201	93.801	94.601	94.301	94.601	93.801	94.101	94.101	94.101	93.501	93.501	94.101	94.801	94.101	95.301
>MW656110_1_Pigeon_circovirus_isolate_TSPSwab2_3_complete_genome	93.901	95.101	95.301	95.101	94.701	94.401	93.301	93.601	93.501	93.701	95.901	94.701	95.101	94.201	94.101	94.301	92.801	93.101	93.401	93.401	93.401	93.501	93.401	93.601	94.001	93.101	92.201	93.701	93.901	92.601	95.001	95.001	95.101	94.701	94.201	94.601	95.401	95.101	94.801	94.901	94.701	94.801	94.801	94.201	94.201	94.701	95.101	94.501	96.201
>MW656127_1_Pigeon_circovirus_isolate_TSPSwab5_2_complete_genome	93.801	94.901	95.101	94.901	94.501	94.201	93.201	93.401	93.301	93.501	95.701	94.501	94.901	94.001	93.901	94.101	92.601	92.901	93.301	93.201	93.301	93.301	93.201	93.401	93.801	93.001	92.001	93.601	93.701	92.501	94.801	94.801	94.901	94.501	94.001	94.401	95.201	94.901	94.601	94.701	94.501	94.601	94.601	94.001	94.001	94.501	95.001	94.401	96.001
>MW656124_1_Pigeon_circovirus_isolate_TSPSwab5_1_complete_genome	93.801	95.001	95.101	94.901	94.601	94.201	93.301	93.401	93.401	93.501	95.701	94.501	94.901	94.001	94.001	94.101	92.701	93.001	93.301	93.301	93.301	93.401	93.301	93.501	93.801	93.001	92.101	93.601	93.701	92.501	94.801	94.801	95.001	94.601	94.001	94.401	95.301	95.001	94.601	94.701	94.501	94.601	94.601	94.001	94.001	94.501	95.001	94.401	96.001
>MW656116_1_Pigeon_circovirus_isolate_TSPSwab5_4_complete_genome	93.801	94.901	95.101	94.901	94.501	94.201	93.201	93.401	93.301	93.501	95.701	94.501	94.901	94.001	93.901	94.101	92.601	92.901	93.301	93.201	93.301	93.301	93.201	93.401	93.801	93.001	92.001	93.601	93.701	92.501	94.801	94.801	94.901	94.501	94.001	94.401	95.201	94.901	94.601	94.701	94.501	94.701	94.701	94.001	94.001	94.501	95.001	94.401	96.001
>MW656115_1_Pigeon_circovirus_isolate_TSPSwab5_3_complete_genome	93.801	94.901	95.201	95.001	94.501	94.201	93.301	93.501	93.401	93.501	95.701	94.601	94.901	94.101	93.901	94.101	92.701	92.901	93.301	93.201	93.301	93.301	93.201	93.401	93.801	92.901	92.001	93.601	93.701	92.501	94.801	94.801	94.901	94.601	94.101	94.401	95.201	94.901	94.601	94.701	94.501	94.601	94.601	94.001	94.001	94.501	95.001	94.501	96.001
>MW656125_1_Pigeon_circovirus_isolate_TSPSwab1_2_complete_genome	93.801	94.901	95.101	94.901	94.601	94.201	93.101	93.401	93.301	93.501	95.701	94.501	94.901	94.101	93.901	94.201	92.601	92.901	93.301	93.201	93.301	93.301	93.201	93.401	93.801	92.901	92.001	93.601	93.701	92.501	94.801	94.801	94.901	94.601	94.001	94.401	95.201	94.901	94.601	94.701	94.601	94.601	94.601	94.101	94.101	94.501	95.001	94.501	96.001
>MW656103_1_Pigeon_circovirus_isolate_TSP_swab1_complete_genome	93.801	95.001	95.101	94.901	94.601	94.201	93.201	93.401	93.401	93.501	95.701	94.601	94.901	94.001	94.001	94.101	92.701	93.001	93.301	93.301	93.301	93.401	93.301	93.501	93.801	93.001	92.001	93.601	93.801	92.501	94.801	94.801	95.001	94.601	94.001	94.401	95.301	95.001	94.701	94.701	94.501	94.701	94.701	94.001	94.001	94.501	95.001	94.501	96.001
>MW656108_1_Pigeon_circovirus_isolate_TSPSwab1_4_complete_genome	93.801	94.901	95.101	94.901	94.501	94.201	93.101	93.401	93.301	93.501	95.701	94.501	94.901	94.001	93.901	94.101	92.601	92.901	93.301	93.201	93.301	93.301	93.201	93.401	93.801	92.901	92.001	93.601	93.701	92.501	94.801	94.801	94.901	94.501	94.001	94.401	95.201	94.901	94.601	94.701	94.501	94.601	94.601	94.001	94.001	94.501	95.001	94.401	96.001
>MW656104_1_Pigeon_circovirus_isolate_TSP_swab2_complete_genome	93.801	94.901	95.101	94.901	94.501	94.201	93.101	93.401	93.301	93.501	95.701	94.501	94.901	94.001	93.901	94.101	92.601	92.901	93.301	93.201	93.301	93.301	93.201	93.401	93.801	92.901	92.001	93.601	93.701	92.501	94.801	94.801	94.901	94.501	94.001	94.401	95.201	94.901	94.601	94.701	94.501	94.601	94.601	94.001	94.001	94.501	95.001	94.401	96.001
>MW656106_1_Pigeon_circovirus_isolate_TSPSwab1_1_complete_genome	93.701	94.901	95.001	94.801	94.501	94.101	93.101	93.301	93.301	93.401	95.601	94.501	94.801	93.901	93.901	94.001	92.601	92.901	93.201	93.201	93.201	93.301	93.201	93.401	93.701	92.901	91.901	93.501	93.701	92.401	94.701	94.701	94.901	94.501	93.901	94.301	95.201	94.901	94.601	94.601	94.401	94.601	94.601	93.901	93.901	94.401	94.901	94.401	95.901
>MW656107_1_Pigeon_circovirus_isolate_TSPSwab1_3_complete_genome	93.901	95.001	95.101	94.901	94.601	94.201	93.201	93.401	93.401	93.501	95.701	94.601	94.901	94.001	94.001	94.101	92.701	93.001	93.301	93.301	93.301	93.401	93.301	93.501	93.801	93.001	92.001	93.601	93.801	92.601	94.801	94.801	95.001	94.601	94.001	94.401	95.301	95.001	94.701	94.701	94.501	94.701	94.701	94.001	94.001	94.501	95.101	94.401	96.001
>MW656122_1_Pigeon_circovirus_isolate_TSP_swab3_complete_genome	93.901	95.001	95.101	94.901	94.601	94.201	93.201	93.401	93.401	93.501	95.701	94.601	94.901	94.001	94.001	94.101	92.701	93.001	93.301	93.301	93.301	93.401	93.301	93.501	93.801	93.001	92.001	93.601	93.801	92.601	94.801	94.801	95.001	94.601	94.101	94.401	95.301	95.001	94.701	94.701	94.501	94.701	94.701	94.001	94.001	94.501	95.101	94.401	96.001
>MW656118_1_Pigeon_circovirus_isolate_TSPSwab16_2_complete_genome	93.901	95.101	95.201	95.001	94.701	94.301	93.301	93.501	93.501	93.601	95.801	94.601	95.001	94.101	94.101	94.201	92.801	93.101	93.401	93.401	93.401	93.501	93.401	93.601	93.901	93.101	92.101	93.701	93.801	92.601	94.901	94.901	95.101	94.701	94.101	94.501	95.401	95.101	94.701	94.801	94.601	94.701	94.701	94.101	94.101	94.601	95.101	94.501	96.101
>MW656105_1_Pigeon_circovirus_isolate_TSP_swab5_complete_genome	93.801	95.001	95.101	94.901	94.601	94.201	93.201	93.401	93.401	93.501	95.701	94.501	94.901	94.001	94.001	94.101	92.701	93.001	93.301	93.301	93.301	93.401	93.301	93.501	93.801	93.001	92.001	93.601	93.701	92.501	94.801	94.801	95.001	94.601	94.001	94.401	95.301	95.001	94.601	94.701	94.501	94.601	94.601	94.001	94.001	94.501	95.001	94.401	96.001
>MW656114_1_Pigeon_circovirus_isolate_TSPSwab3_4_complete_genome	93.801	95.001	95.101	94.901	94.601	94.201	93.201	93.401	93.401	93.501	95.701	94.601	94.901	94.001	94.001	94.201	92.701	93.001	93.301	93.301	93.301	93.401	93.301	93.501	93.801	93.001	92.001	93.601	93.801	92.501	94.801	94.801	95.001	94.601	94.001	94.401	95.301	95.001	94.701	94.701	94.501	94.701	94.701	94.001	94.001	94.501	95.001	94.501	96.001
>MW656112_1_Pigeon_circovirus_isolate_TSPSwab3_1_complete_genome	93.901	95.001	95.201	95.001	94.601	94.301	93.201	93.501	93.401	93.601	95.801	94.601	95.001	94.101	94.001	94.201	92.701	93.001	93.401	93.301	93.401	93.401	93.301	93.501	93.901	93.001	92.101	93.701	93.801	92.601	94.901	94.901	95.001	94.601	94.101	94.501	95.301	95.001	94.701	94.801	94.601	94.701	94.701	94.101	94.101	94.601	95.101	94.501	96.101
>MW656117_1_Pigeon_circovirus_isolate_TSPSwab7_3_complete_genome	93.801	94.901	95.101	94.901	94.501	94.201	93.101	93.401	93.301	93.501	95.701	94.501	94.901	94.001	93.901	94.101	92.601	92.901	93.301	93.201	93.301	93.301	93.201	93.401	93.801	92.901	92.001	93.601	93.701	92.501	94.801	94.801	94.901	94.501	94.001	94.401	95.201	94.901	94.601	94.701	94.501	94.601	94.601	94.001	94.001	94.501	95.001	94.401	96.001
>MW656092_1_Pigeon_circovirus_isolate_TSP17_6_complete_genome	93.801	95.001	95.101	94.901	94.601	94.201	93.201	93.401	93.401	93.501	95.701	94.601	94.901	94.001	94.001	94.101	92.701	93.001	93.301	93.201	93.301	93.301	93.201	93.401	93.801	93.001	92.001	93.601	93.801	92.501	94.801	94.801	95.001	94.601	94.001	94.401	95.301	95.101	94.701	94.701	94.501	94.701	94.701	94.001	94.001	94.501	95.001	94.601	96.001
>MW656111_1_Pigeon_circovirus_isolate_TSPSwab2_4_complete_genome	93.801	95.001	95.101	94.901	94.601	94.201	93.201	93.401	93.401	93.501	95.701	94.601	94.901	94.001	94.001	94.101	92.701	93.001	93.301	93.201	93.301	93.301	93.201	93.401	93.801	93.001	92.001	93.601	93.801	92.501	94.801	94.801	95.001	94.601	94.001	94.401	95.301	95.001	94.701	94.701	94.501	94.701	94.701	94.001	94.001	94.501	95.001	94.501	96.001
>MW656123_1_Pigeon_circovirus_isolate_TSPSwab2_1_complete_genome	93.701	94.901	95.001	94.801	94.501	94.101	93.101	93.301	93.301	93.401	95.601	94.501	94.801	93.901	93.901	94.001	92.601	93.101	93.201	93.101	93.201	93.201	93.101	93.301	93.701	92.901	91.901	93.501	93.701	92.401	94.701	94.701	94.901	94.501	93.901	94.301	95.201	94.901	94.601	94.601	94.501	94.601	94.601	93.901	93.901	94.401	94.901	94.401	95.901
>MW656121_1_Pigeon_circovirus_isolate_TSP18_1_complete_genome	93.901	95.101	95.201	95.001	94.701	94.301	93.301	93.501	93.501	93.601	95.801	94.701	95.001	94.101	94.101	94.201	92.801	93.101	93.401	93.301	93.401	93.401	93.301	93.501	93.901	93.101	92.101	93.701	93.901	92.601	94.901	94.901	95.101	94.701	94.101	94.501	95.401	95.101	94.801	94.801	94.801	94.801	94.801	94.101	94.101	94.601	95.101	94.701	96.101
>MW656113_1_Pigeon_circovirus_isolate_TSPSwab3_3_complete_genome	93.901	95.101	95.201	95.001	94.701	94.301	93.301	93.501	93.501	93.601	95.801	94.701	95.001	94.101	94.101	94.201	92.801	93.101	93.401	93.301	93.401	93.401	93.301	93.501	93.901	93.101	92.101	93.701	93.901	92.601	94.901	94.901	95.101	94.701	94.101	94.501	95.401	95.101	94.801	94.801	94.601	94.801	94.801	94.101	94.101	94.601	95.101	94.601	96.101
>MW656029_1_Pigeon_circovirus_isolate_TSP3_9_complete_genome	93.901	95.101	95.201	95.001	94.701	94.301	93.301	93.501	93.501	93.601	95.801	94.701	95.001	94.101	94.101	94.201	92.801	93.101	93.401	93.301	93.401	93.401	93.301	93.501	93.901	93.101	92.101	93.701	93.901	92.601	94.901	94.901	95.101	94.701	94.101	94.501	95.401	95.101	94.801	94.801	94.601	94.801	94.801	94.101	94.101	94.601	95.101	94.601	96.101
>MW656021_1_Pigeon_circovirus_isolate_TSP18_2118_complete_genome	93.901	95.001	95.101	94.901	94.601	94.201	93.201	93.401	93.401	93.501	95.701	94.601	94.901	94.001	94.001	94.101	92.701	93.001	93.301	93.201	93.301	93.301	93.201	93.401	93.901	93.001	92.001	93.601	93.801	92.501	94.801	94.801	95.001	94.601	94.001	94.401	95.301	95.001	94.701	94.701	94.501	94.701	94.701	94.101	94.101	94.601	95.101	94.501	96.001
>MW656058_1_Pigeon_circovirus_isolate_TSP13_2_complete_genome	93.801	94.901	95.101	94.901	94.501	94.201	93.101	93.401	93.301	93.501	95.701	94.501	94.901	94.001	93.901	94.101	92.601	92.901	93.201	93.201	93.201	93.301	93.201	93.401	93.801	92.901	92.001	93.601	93.801	92.501	94.801	94.801	95.001	94.501	94.101	94.401	95.201	95.001	94.601	94.701	94.601	94.601	94.601	94.001	94.001	94.501	95.001	94.401	96.001
>MW656057_1_Pigeon_circovirus_isolate_TSP13_1_complete_genome	93.801	95.001	95.101	94.901	94.601	94.201	93.201	93.401	93.401	93.501	95.701	94.601	94.901	94.001	94.001	94.101	92.701	93.001	93.301	93.201	93.301	93.301	93.201	93.401	93.801	93.001	92.001	93.601	93.901	92.501	94.801	94.801	95.101	94.601	94.101	94.401	95.301	95.101	94.701	94.701	94.601	94.701	94.701	94.001	94.001	94.501	95.001	94.501	96.001
>MW656099_1_Pigeon_circovirus_isolate_TSP18_7_complete_genome	93.801	94.901	95.101	94.901	94.501	94.201	93.101	93.401	93.301	93.501	95.701	94.501	94.901	94.001	93.901	94.101	92.701	92.901	93.201	93.201	93.201	93.301	93.201	93.401	93.801	92.901	92.001	93.701	93.901	92.601	94.801	94.801	95.001	94.501	94.201	94.501	95.301	95.101	94.601	94.701	94.701	94.601	94.601	94.001	94.001	94.501	95.101	94.401	96.001
>MW656000_1_Pigeon_circovirus_isolate_TSP18_5_complete_genome	93.701	94.901	95.001	94.801	94.501	94.101	93.101	93.301	93.301	93.401	95.601	94.501	94.801	93.901	93.901	94.001	92.701	92.901	93.201	93.201	93.201	93.301	93.201	93.401	93.701	92.901	91.901	93.601	93.901	92.501	94.701	94.701	95.001	94.501	94.101	94.501	95.301	95.101	94.601	94.601	94.601	94.601	94.601	93.901	93.901	94.401	95.101	94.401	95.901
>MW655999_1_Pigeon_circovirus_isolate_TSP15_8_complete_genome	93.701	94.801	95.001	94.801	94.401	94.101	93.001	93.301	93.201	93.401	95.601	94.401	94.801	93.901	93.801	94.001	92.701	92.901	93.201	93.101	93.201	93.201	93.101	93.301	93.701	92.901	91.901	93.601	93.801	92.501	94.701	94.701	94.901	94.401	94.101	94.401	95.301	95.001	94.501	94.601	94.601	94.501	94.501	93.901	93.901	94.401	95.001	94.401	95.801
>MW656044_1_Pigeon_circovirus_isolate_TSP10_9_complete_genome	93.801	95.001	95.101	94.901	94.601	94.201	93.201	93.401	93.401	93.501	95.701	94.601	94.901	94.001	94.001	94.101	92.801	93.001	93.301	93.201	93.301	93.301	93.201	93.401	93.801	93.001	92.001	93.701	94.001	92.601	94.801	94.801	95.101	94.601	94.201	94.501	95.401	95.201	94.701	94.701	94.701	94.701	94.701	94.001	94.001	94.501	95.101	94.501	96.001
>MW656024_1_Pigeon_circovirus_isolate_TSP3_4_complete_genome	93.801	95.001	95.101	94.901	94.601	94.201	93.201	93.401	93.401	93.501	95.701	94.601	94.901	94.001	94.001	94.101	92.801	93.001	93.301	93.201	93.301	93.301	93.201	93.401	93.801	93.001	92.001	93.701	94.001	92.601	94.801	94.801	95.101	94.601	94.201	94.501	95.401	95.201	94.701	94.701	94.701	94.701	94.701	94.001	94.001	94.501	95.101	94.501	96.001
>MW656096_1_Pigeon_circovirus_isolate_TSP18_3_complete_genome	93.801	94.901	95.101	94.901	94.501	94.201	93.101	93.401	93.301	93.501	95.701	94.501	94.901	94.001	93.901	94.101	92.701	92.901	93.201	93.201	93.201	93.301	93.201	93.401	93.801	92.901	92.001	93.801	94.001	92.701	94.801	94.801	95.101	94.501	94.201	94.501	95.301	95.201	94.601	94.701	94.701	94.601	94.601	94.101	94.101	94.601	95.101	94.501	96.001
>MW656049_1_Pigeon_circovirus_isolate_TSP11_10_complete_genome	93.801	94.901	95.101	94.901	94.501	94.201	93.101	93.401	93.301	93.501	95.701	94.501	94.901	94.001	93.901	94.101	92.701	92.901	93.201	93.201	93.201	93.301	93.201	93.401	93.801	92.901	92.001	93.801	94.001	92.701	94.801	94.801	95.101	94.501	94.201	94.501	95.301	95.201	94.601	94.701	94.701	94.601	94.601	94.101	94.101	94.601	95.101	94.501	96.001
>MW656030_1_Pigeon_circovirus_isolate_TSP3_10_complete_genome	93.801	94.901	95.101	94.901	94.501	94.201	93.101	93.401	93.301	93.501	95.701	94.501	94.901	94.001	93.901	94.101	92.701	92.901	93.201	93.201	93.201	93.301	93.201	93.401	93.801	92.901	92.001	93.801	94.001	92.701	94.801	94.801	95.101	94.501	94.201	94.501	95.301	95.201	94.601	94.701	94.701	94.601	94.601	94.101	94.101	94.601	95.101	94.501	96.001
>MW656042_1_Pigeon_circovirus_isolate_TSP10_7_complete_genome	93.601	94.701	94.901	94.701	94.301	94.001	92.901	93.201	93.101	93.301	95.501	94.301	94.701	93.801	93.701	93.901	92.501	92.701	93.001	93.001	93.001	93.101	93.001	93.201	93.601	92.701	91.801	93.601	93.801	92.501	94.601	94.601	94.901	94.301	94.001	94.301	95.101	95.001	94.401	94.501	94.501	94.401	94.401	93.901	93.901	94.401	94.901	94.301	95.801
>MW656022_1_Pigeon_circovirus_isolate_TSP3_1_complete_genome	93.801	94.901	95.101	94.901	94.501	94.201	93.101	93.401	93.301	93.501	95.701	94.501	94.901	94.001	93.901	94.101	92.601	92.901	93.201	93.201	93.201	93.301	93.201	93.401	93.801	92.901	92.001	93.701	93.901	92.601	94.801	94.801	95.101	94.501	94.101	94.401	95.201	95.101	94.601	94.701	94.601	94.601	94.601	94.101	94.101	94.601	95.001	94.501	96.001
>MW656023_1_Pigeon_circovirus_isolate_TSP3_2_complete_genome	93.701	94.801	95.001	94.801	94.401	94.101	93.001	93.301	93.201	93.401	95.601	94.401	94.801	93.901	93.801	94.001	92.601	92.801	93.101	93.101	93.101	93.201	93.101	93.301	93.701	92.801	91.901	93.701	93.901	92.601	94.701	94.701	95.001	94.401	94.101	94.401	95.201	95.101	94.501	94.601	94.601	94.501	94.501	94.001	94.001	94.501	95.001	94.401	95.901
>MW656063_1_Pigeon_circovirus_isolate_TSP13_9_complete_genome	93.801	95.001	95.101	94.901	94.601	94.201	93.201	93.401	93.401	93.501	95.701	94.601	94.901	94.001	94.001	94.101	92.701	93.001	93.301	93.201	93.301	93.301	93.201	93.401	93.901	93.001	92.001	93.701	94.001	92.601	94.801	94.801	95.201	94.601	94.101	94.401	95.301	95.201	94.701	94.701	94.601	94.701	94.701	94.101	94.101	94.601	95.001	94.601	96.001
>MW656060_1_Pigeon_circovirus_isolate_TSP13_4_complete_genome	93.801	95.001	95.101	94.901	94.601	94.201	93.201	93.401	93.401	93.501	95.701	94.601	94.901	94.001	94.001	94.101	92.701	93.001	93.301	93.201	93.301	93.301	93.201	93.401	93.901	93.001	92.001	93.701	94.001	92.601	94.801	94.801	95.201	94.601	94.101	94.401	95.301	95.201	94.701	94.701	94.601	94.701	94.701	94.101	94.101	94.601	95.001	94.601	96.001
>MW656095_1_Pigeon_circovirus_isolate_TSP18_2_complete_genome	93.801	94.901	95.101	94.901	94.501	94.201	93.101	93.401	93.301	93.501	95.701	94.501	94.901	94.001	94.001	94.101	92.601	92.901	93.201	93.201	93.201	93.301	93.201	93.401	93.801	92.901	92.001	93.701	93.901	92.601	94.801	94.801	95.101	94.501	94.101	94.401	95.201	95.101	94.701	94.801	94.601	94.601	94.601	94.101	94.101	94.601	95.001	94.501	96.001
>MW656090_1_Pigeon_circovirus_isolate_TSP17_2_complete_genome	93.801	94.901	95.101	94.901	94.501	94.201	93.101	93.401	93.301	93.501	95.701	94.501	94.901	94.001	93.901	94.101	92.701	93.001	93.301	93.301	93.301	93.401	93.301	93.501	93.801	92.901	92.001	93.701	93.801	92.601	94.801	94.801	95.001	94.501	94.001	94.501	95.301	95.001	94.601	94.701	94.501	94.601	94.601	94.101	94.101	94.601	95.101	94.601	96.001
>MW656035_1_Pigeon_circovirus_isolate_TSP9_5_complete_genome	93.701	94.901	95.001	94.801	94.501	94.101	93.101	93.301	93.301	93.401	95.601	94.501	94.801	93.901	93.901	94.001	92.701	93.001	93.301	93.201	93.301	93.301	93.201	93.401	93.801	92.901	91.901	93.601	93.801	92.501	94.701	94.701	95.001	94.501	93.901	94.401	95.301	95.001	94.601	94.601	94.401	94.601	94.601	94.001	94.001	94.501	95.001	94.601	95.901
>MW656031_1_Pigeon_circovirus_isolate_TSP7_5_complete_genome	93.701	94.901	95.001	94.801	94.501	94.101	93.101	93.301	93.301	93.401	95.601	94.501	94.801	93.901	93.901	94.001	92.701	93.001	93.301	93.201	93.301	93.301	93.201	93.401	93.801	92.901	91.901	93.601	93.801	92.501	94.701	94.701	95.001	94.501	93.901	94.401	95.301	95.001	94.601	94.601	94.401	94.601	94.601	94.001	94.001	94.501	95.001	94.601	95.901
>MW656032_1_Pigeon_circovirus_isolate_TSP8_4_complete_genome	93.701	94.801	95.001	94.801	94.401	94.101	93.001	93.301	93.201	93.401	95.601	94.401	94.801	93.901	93.801	94.001	92.601	92.901	93.201	93.201	93.201	93.301	93.201	93.401	93.701	92.801	91.901	93.601	93.801	92.501	94.701	94.701	95.001	94.401	94.001	94.401	95.201	95.001	94.501	94.601	94.501	94.501	94.501	94.001	94.001	94.501	95.001	94.501	95.901
>MW656036_1_Pigeon_circovirus_isolate_TSP9_8_complete_genome	93.901	95.101	95.201	95.001	94.601	94.201	93.201	93.501	93.501	93.501	95.701	94.701	94.901	94.001	94.101	94.201	92.901	93.001	93.301	93.201	93.201	93.301	93.201	93.401	93.901	93.101	92.101	93.801	94.101	92.701	94.801	94.801	95.201	94.701	94.201	94.501	95.401	95.301	94.701	94.701	94.601	94.801	94.801	94.201	94.201	94.601	95.201	94.701	96.001
>MW656120_1_Pigeon_circovirus_isolate_TSP7_8_complete_genome	93.801	95.001	95.101	94.901	94.501	94.101	93.101	93.401	93.401	93.401	95.601	94.601	94.801	93.901	94.001	94.101	92.801	92.901	93.201	93.101	93.101	93.201	93.101	93.301	93.801	93.001	92.001	93.701	94.001	92.601	94.701	94.701	95.101	94.601	94.101	94.401	95.301	95.201	94.601	94.601	94.501	94.701	94.701	94.101	94.101	94.501	95.101	94.601	95.901
>MW656094_1_Pigeon_circovirus_isolate_TSP17_9_complete_genome	93.701	94.901	95.001	94.801	94.501	94.101	93.101	93.301	93.301	93.401	95.601	94.501	94.801	93.901	93.901	94.001	92.601	92.901	93.201	93.101	93.201	93.201	93.101	93.301	93.801	92.901	91.901	93.601	93.901	92.501	94.701	94.701	95.101	94.501	94.001	94.301	95.201	95.101	94.601	94.601	94.501	94.601	94.601	94.001	94.001	94.501	94.901	94.501	95.901
>MW656089_1_Pigeon_circovirus_isolate_TSP17_1_complete_genome	93.601	94.801	94.901	94.701	94.401	94.001	93.001	93.201	93.201	93.301	95.501	94.401	94.701	93.801	93.801	93.901	92.501	92.801	93.101	93.001	93.101	93.101	93.001	93.201	93.701	92.801	91.801	93.501	93.801	92.401	94.601	94.601	95.001	94.401	93.901	94.201	95.101	95.001	94.501	94.501	94.401	94.601	94.601	93.901	93.901	94.501	94.801	94.401	95.801
>MW656093_1_Pigeon_circovirus_isolate_TSP17_8_complete_genome	93.601	94.801	94.901	94.701	94.301	93.901	93.101	93.301	93.301	93.401	95.501	94.501	94.701	93.701	93.801	94.001	92.501	92.801	93.201	93.101	93.201	93.201	93.101	93.301	93.501	92.701	91.701	93.401	93.701	92.401	94.501	94.501	94.801	94.301	94.001	94.201	95.101	94.901	94.501	94.501	94.501	94.401	94.401	93.801	93.801	94.401	94.801	94.301	95.801
>MW656091_1_Pigeon_circovirus_isolate_TSP17_5_complete_genome	93.701	94.801	94.901	94.701	94.401	94.001	93.001	93.201	93.201	93.301	95.501	94.401	94.701	93.801	93.801	93.901	92.501	92.801	93.101	93.001	93.101	93.101	93.001	93.201	93.701	92.801	91.801	93.601	93.801	92.401	94.601	94.601	95.001	94.401	93.901	94.201	95.101	95.001	94.501	94.601	94.401	94.501	94.501	93.901	93.901	94.401	94.801	94.401	95.801
>MW656101_1_Pigeon_circovirus_isolate_TSP18_10_complete_genome	93.801	94.901	95.101	94.901	94.501	94.201	93.101	93.401	93.301	93.501	95.701	94.501	94.901	94.001	93.901	94.101	92.701	93.001	93.301	93.301	93.301	93.401	93.301	93.501	93.801	92.901	92.001	93.701	93.801	92.601	94.801	94.801	95.001	94.501	94.001	94.501	95.301	95.001	94.601	94.701	94.501	94.601	94.601	94.101	94.101	94.601	95.101	94.601	96.001
>MW656064_1_Pigeon_circovirus_isolate_TSP13_10_complete_genome	93.801	94.901	95.101	94.901	94.501	94.201	93.101	93.401	93.301	93.501	95.701	94.501	94.901	94.001	93.901	94.101	92.701	93.001	93.301	93.301	93.301	93.401	93.301	93.501	93.801	92.901	92.001	93.701	93.801	92.601	94.801	94.801	95.001	94.501	94.001	94.501	95.301	95.001	94.601	94.701	94.501	94.601	94.601	94.101	94.101	94.601	95.101	94.601	96.001
>MW656027_1_Pigeon_circovirus_isolate_TSP3_7_complete_genome	93.701	94.901	95.001	94.801	94.501	94.101	93.101	93.301	93.301	93.401	95.601	94.501	94.801	93.901	93.901	94.001	92.701	93.001	93.301	93.201	93.301	93.301	93.201	93.401	93.801	92.901	91.901	93.601	93.801	92.501	94.701	94.701	95.001	94.501	93.901	94.401	95.301	95.001	94.601	94.601	94.401	94.601	94.601	94.001	94.001	94.501	95.001	94.601	95.901
>MW656043_1_Pigeon_circovirus_isolate_TSP10_8_complete_genome	93.701	94.801	95.001	94.801	94.401	94.101	93.001	93.301	93.201	93.401	95.601	94.401	94.801	93.901	93.801	94.001	92.601	92.901	93.201	93.201	93.201	93.301	93.201	93.401	93.701	92.801	92.001	93.601	93.701	92.501	94.701	94.701	94.901	94.401	93.901	94.401	95.201	94.901	94.501	94.601	94.401	94.501	94.501	94.001	94.001	94.501	95.001	94.501	95.901
>MW656040_1_Pigeon_circovirus_isolate_TSP10_5_complete_genome	93.801	94.901	95.101	94.901	94.501	94.201	93.101	93.401	93.301	93.501	95.701	94.501	94.901	94.001	93.901	94.101	92.701	93.001	93.301	93.301	93.301	93.401	93.301	93.501	93.801	92.901	92.001	93.701	93.901	92.601	94.801	94.801	95.101	94.501	94.101	94.501	95.301	95.101	94.601	94.701	94.601	94.601	94.601	94.101	94.101	94.601	95.101	94.601	96.001
>MW656037_1_Pigeon_circovirus_isolate_TSP10_2_complete_genome	93.801	94.901	95.101	94.901	94.501	94.201	93.101	93.401	93.301	93.501	95.701	94.501	94.901	94.001	93.901	94.101	92.701	93.001	93.301	93.301	93.301	93.401	93.301	93.501	93.801	92.901	92.001	93.701	93.901	92.601	94.801	94.801	95.101	94.501	94.101	94.501	95.301	95.101	94.601	94.701	94.601	94.601	94.601	94.101	94.101	94.601	95.101	94.601	96.001
>MW656077_1_Pigeon_circovirus_isolate_TSP15_6_complete_genome	93.601	94.801	94.901	94.701	94.401	94.001	93.001	93.201	93.201	93.301	95.501	94.401	94.701	93.801	93.801	93.901	92.601	92.901	93.201	93.101	93.201	93.201	93.101	93.301	93.701	92.801	91.901	93.501	93.801	92.401	94.601	94.601	95.001	94.401	93.901	94.301	95.201	95.001	94.501	94.601	94.401	94.501	94.501	93.901	93.901	94.401	94.901	94.501	95.801
>MW656075_1_Pigeon_circovirus_isolate_TSP15_4_complete_genome	93.701	94.901	95.001	94.801	94.501	94.101	93.101	93.301	93.301	93.401	95.601	94.501	94.801	93.901	93.901	94.001	92.701	93.001	93.301	93.201	93.301	93.301	93.201	93.401	93.801	92.901	92.001	93.601	93.801	92.501	94.701	94.701	95.001	94.501	93.901	94.401	95.301	95.001	94.601	94.601	94.401	94.601	94.601	94.001	94.001	94.501	95.001	94.601	95.901
>MW656020_1_Pigeon_circovirus_isolate_TSP15_2_complete_genome	94.501	95.701	95.601	95.401	95.301	95.001	94.001	94.201	94.201	94.301	96.501	95.301	95.701	94.801	94.201	94.901	93.601	93.401	93.801	93.701	93.701	93.801	93.701	93.901	94.701	93.901	93.001	94.601	94.701	93.401	95.701	95.701	95.901	95.401	94.801	95.201	96.101	95.901	95.401	95.501	94.901	95.401	95.401	94.901	94.901	95.401	95.901	95.301	96.301
>MW656098_1_Pigeon_circovirus_isolate_TSP18_6_complete_genome	93.801	94.901	95.101	94.901	94.501	94.201	93.101	93.401	93.301	93.501	95.701	94.501	94.901	94.001	93.901	94.101	92.801	93.001	93.301	93.301	93.301	93.401	93.301	93.501	93.801	92.901	92.001	93.801	93.901	92.701	94.801	94.801	95.001	94.501	94.101	94.601	95.401	95.101	94.601	94.701	94.601	94.601	94.601	94.101	94.101	94.601	95.201	94.601	96.001
>MW656028_1_Pigeon_circovirus_isolate_TSP3_8_complete_genome	93.801	94.901	95.101	94.901	94.501	94.201	93.101	93.401	93.301	93.501	95.701	94.501	94.901	94.001	93.901	94.101	92.801	93.001	93.301	93.301	93.301	93.401	93.301	93.501	93.801	92.901	92.001	93.701	93.801	92.601	94.801	94.801	94.901	94.501	94.101	94.601	95.401	95.001	94.601	94.701	94.601	94.601	94.601	94.001	94.001	94.501	95.201	94.501	96.001
>MW656097_1_Pigeon_circovirus_isolate_TSP18_4_complete_genome	93.801	94.901	95.101	94.901	94.501	94.201	93.101	93.401	93.301	93.501	95.701	94.501	94.901	94.001	93.901	94.101	92.701	93.001	93.301	93.301	93.301	93.401	93.301	93.501	93.801	92.901	92.001	93.701	93.801	92.601	94.801	94.801	95.001	94.501	94.001	94.501	95.301	95.001	94.601	94.701	94.501	94.601	94.601	94.101	94.101	94.601	95.101	94.601	96.001
>MW656048_1_Pigeon_circovirus_isolate_TSP11_8_complete_genome	93.701	94.901	95.001	94.801	94.501	94.101	93.101	93.301	93.301	93.401	95.601	94.501	94.801	93.901	93.901	94.001	92.801	93.001	93.301	93.201	93.301	93.301	93.201	93.401	93.801	92.901	91.901	93.701	93.901	92.601	94.701	94.701	95.001	94.501	94.001	94.501	95.401	95.101	94.601	94.601	94.501	94.601	94.601	94.001	94.001	94.501	95.101	94.601	95.901
>MW656046_1_Pigeon_circovirus_isolate_TSP11_5_complete_genome	93.801	95.001	95.101	94.901	94.601	94.201	93.201	93.401	93.401	93.501	95.701	94.601	94.901	94.001	94.001	94.101	92.801	93.001	93.301	93.201	93.301	93.301	93.201	93.401	93.901	93.001	92.001	93.801	94.001	92.701	94.801	94.801	95.101	94.601	94.101	94.501	95.401	95.201	94.701	94.701	94.601	94.701	94.701	94.101	94.101	94.601	95.101	94.601	96.001
>MW656038_1_Pigeon_circovirus_isolate_TSP10_3_complete_genome	93.801	95.001	95.101	94.901	94.601	94.201	93.201	93.401	93.401	93.501	95.701	94.601	94.901	94.001	94.001	94.101	92.801	93.001	93.301	93.201	93.301	93.301	93.201	93.401	93.901	93.001	92.001	93.801	94.001	92.701	94.801	94.801	95.101	94.601	94.101	94.501	95.401	95.201	94.701	94.701	94.601	94.701	94.701	94.101	94.101	94.601	95.101	94.601	96.001
>MW656059_1_Pigeon_circovirus_isolate_TSP13_3_complete_genome	93.901	95.001	95.201	95.001	94.601	94.301	93.201	93.501	93.401	93.601	95.801	94.601	95.001	94.101	94.001	93.501	92.801	93.001	93.301	93.301	93.301	93.401	93.301	93.501	94.001	93.101	92.101	93.901	94.101	92.801	94.901	94.901	95.201	94.701	94.201	94.501	95.401	95.301	94.701	94.801	94.701	94.101	94.101	94.201	94.201	94.701	95.201	93.901	96.101
>MW656079_1_Pigeon_circovirus_isolate_TSP15_10_complete_genome	93.801	94.901	95.101	94.901	94.501	94.201	93.101	93.401	93.301	93.501	95.701	94.501	94.901	94.001	93.901	94.101	92.701	92.901	93.201	93.201	93.201	93.301	93.201	93.401	93.801	93.001	92.001	93.801	93.901	92.701	94.801	94.801	95.001	94.501	94.101	94.501	95.301	95.101	94.601	94.701	94.601	94.601	94.601	94.101	94.101	94.601	95.101	94.501	96.001
>MW656045_1_Pigeon_circovirus_isolate_TSP11_2_complete_genome	93.901	95.001	95.201	95.001	94.601	94.301	93.201	93.501	93.401	93.601	95.801	94.601	95.001	94.101	94.001	94.201	92.701	93.001	93.301	93.301	93.301	93.401	93.301	93.501	93.901	93.001	92.101	93.901	94.001	92.801	94.901	94.901	95.101	94.601	94.201	94.601	95.401	95.201	94.701	94.801	94.701	94.701	94.701	94.201	94.201	94.701	95.201	94.601	96.101
>MW656100_1_Pigeon_circovirus_isolate_TSP18_9_complete_genome	93.801	94.901	95.101	94.901	94.501	94.201	93.101	93.401	93.301	93.501	95.701	94.501	94.901	94.001	93.901	94.101	92.601	92.901	93.201	93.201	93.201	93.301	93.201	93.401	93.801	92.901	92.001	93.701	93.801	92.601	94.801	94.801	95.001	94.501	94.001	94.401	95.201	95.001	94.601	94.701	94.601	94.601	94.601	94.101	94.101	94.601	95.001	94.501	96.001
>MW656062_1_Pigeon_circovirus_isolate_TSP13_7_complete_genome	93.901	95.001	95.201	95.001	94.601	94.301	93.201	93.501	93.401	93.601	95.801	94.601	95.001	94.101	94.001	94.201	92.701	93.001	93.301	93.301	93.301	93.401	93.301	93.501	93.901	93.001	92.101	93.801	93.901	92.701	94.901	94.901	95.101	94.601	94.101	94.501	95.301	95.101	94.701	94.801	94.601	94.701	94.701	94.201	94.201	94.701	95.101	94.601	96.101
>MW656061_1_Pigeon_circovirus_isolate_TSP13_5_complete_genome	93.901	95.001	95.201	95.001	94.601	94.301	93.201	93.501	93.401	93.601	95.801	94.601	95.001	94.101	94.001	94.201	92.701	93.001	93.301	93.301	93.301	93.401	93.301	93.501	93.901	93.001	92.101	93.801	93.901	92.701	94.901	94.901	95.101	94.601	94.101	94.501	95.301	95.101	94.701	94.801	94.601	94.701	94.701	94.201	94.201	94.701	95.101	94.601	96.101
>MW656041_1_Pigeon_circovirus_isolate_TSP10_6_complete_genome	93.901	95.001	95.201	95.001	94.601	94.301	93.201	93.501	93.401	93.601	95.801	94.601	95.001	94.101	94.001	94.201	92.701	93.001	93.301	93.301	93.301	93.401	93.301	93.501	93.901	93.001	92.101	93.801	93.901	92.701	94.901	94.901	95.101	94.601	94.101	94.501	95.301	95.101	94.701	94.801	94.601	94.701	94.701	94.201	94.201	94.701	95.101	94.601	96.101
>MW656039_1_Pigeon_circovirus_isolate_TSP10_4_complete_genome	93.901	95.001	95.201	95.001	94.601	94.301	93.201	93.501	93.401	93.601	95.801	94.601	95.001	94.101	94.001	94.201	92.701	93.001	93.301	93.301	93.301	93.401	93.301	93.501	93.901	93.001	92.101	93.801	93.901	92.701	94.901	94.901	95.101	94.601	94.101	94.501	95.301	95.101	94.701	94.801	94.601	94.701	94.701	94.201	94.201	94.701	95.101	94.601	96.101
>MW656026_1_Pigeon_circovirus_isolate_TSP3_6_complete_genome	93.901	95.001	95.201	95.001	94.601	94.301	93.201	93.501	93.401	93.601	95.801	94.601	95.001	94.101	94.001	94.201	92.701	93.001	93.301	93.301	93.301	93.401	93.301	93.501	93.901	93.001	92.101	93.801	93.901	92.701	94.901	94.901	95.101	94.601	94.101	94.501	95.301	95.101	94.701	94.801	94.601	94.701	94.701	94.201	94.201	94.701	95.101	94.601	96.101
>MW656025_1_Pigeon_circovirus_isolate_TSP3_5_complete_genome	93.901	95.001	95.201	95.001	94.601	94.301	93.201	93.501	93.401	93.601	95.801	94.601	95.001	94.101	94.001	94.201	92.701	93.001	93.301	93.301	93.301	93.401	93.301	93.501	93.901	93.001	92.101	93.801	93.901	92.701	94.901	94.901	95.101	94.601	94.101	94.501	95.301	95.101	94.701	94.801	94.601	94.701	94.701	94.201	94.201	94.701	95.101	94.601	96.101
>KY114965_1_Columbid_circovirus_isolate_RS0120_complete_genome	91.901	91.701	91.901	91.901	91.201	90.801	90.101	90.001	90.001	89.901	91.601	90.801	91.201	90.001	90.001	90.101	89.901	88.701	89.301	89.201	89.301	89.301	89.201	89.401	89.601	89.701	89.001	90.401	90.601	89.901	91.001	91.001	91.001	90.801	90.801	90.101	90.901	89.801	90.201	90.801	90.701	90.301	90.301	90.501	90.501	90.301	90.201	89.701	91.501
>KX808543_1_Columbid_circovirus_isolate_PR1625_complete_genome	91.901	91.701	91.901	91.901	91.201	90.801	90.101	90.001	90.001	89.901	91.601	90.801	91.201	90.001	90.001	90.101	89.901	88.701	89.301	89.201	89.301	89.301	89.201	89.401	89.601	89.701	89.001	90.401	90.601	89.901	91.001	91.001	91.001	90.801	90.801	90.101	90.901	89.801	90.201	90.801	90.701	90.301	90.301	90.501	90.501	90.301	90.201	89.701	91.501
>MF621931_1_Columbid_circovirus_isolate_GCMA1_2016_complete_genome	91.601	91.401	92.001	92.001	91.001	90.701	90.201	90.301	90.201	89.901	91.501	90.601	91.101	89.901	90.101	90.201	89.501	88.601	88.801	88.701	88.701	88.801	88.701	88.901	89.301	89.401	88.601	90.001	90.101	89.601	90.801	90.801	91.201	90.501	90.501	90.001	90.701	90.101	90.001	90.901	90.801	90.301	90.301	90.601	90.601	90.001	90.001	89.801	91.301
>MF664483_1_Columbid_circovirus_strain_SCMA21_2016_complete_genome	91.301	91.201	91.701	91.601	90.401	90.401	89.301	89.201	89.201	88.901	90.901	90.201	90.301	89.501	89.401	89.401	89.301	88.301	88.501	88.301	88.401	88.401	88.301	88.501	88.601	88.401	87.701	89.201	89.301	88.701	90.101	90.101	90.301	90.101	89.801	89.501	90.201	89.401	90.101	90.701	90.601	90.201	90.201	90.901	90.901	89.801	89.401	89.701	91.301
>KF738857_1_Columbid_circovirus_isolate_PL44A_complete_genome	92.101	91.901	92.501	92.301	91.201	90.801	89.601	89.601	89.601	89.501	92.001	90.901	91.701	90.001	90.901	89.601	89.601	89.101	88.901	88.701	88.801	88.801	88.701	88.901	89.901	89.401	88.501	90.101	90.401	89.501	91.401	91.401	91.001	90.801	90.301	89.701	90.301	90.401	90.401	90.801	90.801	90.001	90.001	91.101	91.101	90.701	90.501	90.701	92.201
>KF738844_1_Columbid_circovirus_isolate_PL114_complete_genome	92.301	91.901	92.501	92.401	91.501	91.101	89.801	89.801	89.801	89.601	92.301	91.001	91.901	90.301	91.001	90.301	89.601	89.301	89.101	89.001	89.001	89.101	89.001	89.201	90.201	89.501	88.701	90.301	90.501	89.401	91.501	91.501	91.101	91.001	90.501	90.101	90.701	90.401	90.401	91.001	90.901	90.701	90.701	91.001	91.001	90.801	90.501	90.701	92.401
>MW656102_1_Pigeon_circovirus_isolate_TSP20_6_complete_genome	92.101	91.901	92.301	92.201	91.301	90.801	89.601	89.601	89.501	89.801	91.901	90.701	91.601	90.001	90.701	90.201	89.501	88.901	89.001	88.901	88.901	88.901	88.901	89.001	90.001	89.201	88.401	90.001	90.301	89.401	91.201	91.201	91.001	90.901	90.501	89.601	90.301	90.301	90.301	90.701	91.001	90.301	90.301	90.901	90.901	90.801	90.501	90.501	92.201
>MW656069_1_Pigeon_circovirus_isolate_TSP14_5_complete_genome	92.201	92.001	92.401	92.301	91.401	90.901	89.601	89.601	89.601	89.901	92.001	90.701	91.701	90.101	90.701	90.201	89.501	89.001	89.001	88.901	88.901	89.001	88.901	89.101	90.001	89.201	88.401	90.001	90.401	89.401	91.201	91.201	91.101	91.001	90.501	89.601	90.301	90.401	90.301	90.701	91.101	90.301	90.301	90.901	90.901	90.801	90.601	90.601	92.201
>MW656072_1_Pigeon_circovirus_isolate_TSP14_8_complete_genome	92.101	91.901	92.301	92.201	91.301	90.801	89.601	89.601	89.501	89.801	91.901	90.701	91.601	90.001	90.701	90.201	89.601	89.001	89.101	88.901	89.001	89.001	88.901	89.101	90.001	89.201	88.401	90.001	90.301	89.401	91.201	91.201	91.001	90.901	90.501	89.701	90.401	90.301	90.301	90.701	91.001	90.301	90.301	90.901	90.901	90.801	90.601	90.601	92.201
>MW656070_1_Pigeon_circovirus_isolate_TSP14_6_complete_genome	92.101	91.901	92.301	92.201	91.301	90.801	89.601	89.601	89.501	89.801	91.901	90.701	91.601	90.001	90.701	90.201	89.601	89.001	89.101	88.901	89.001	89.001	88.901	89.101	90.001	89.201	88.401	90.001	90.301	89.401	91.201	91.201	91.001	90.901	90.501	89.701	90.401	90.301	90.301	90.701	91.001	90.301	90.301	90.901	90.901	90.801	90.601	90.601	92.201
>MW656053_1_Pigeon_circovirus_isolate_TSP12_6_complete_genome	92.101	91.901	92.301	92.201	91.301	90.801	89.601	89.601	89.501	89.801	91.901	90.701	91.601	90.001	90.701	90.201	89.601	89.001	89.101	88.901	89.001	89.001	88.901	89.101	90.001	89.201	88.401	90.001	90.301	89.401	91.201	91.201	91.001	90.901	90.501	89.701	90.401	90.301	90.301	90.701	91.001	90.301	90.301	90.901	90.901	90.801	90.601	90.601	92.201
>MW656067_1_Pigeon_circovirus_isolate_TSP14_3_complete_genome	92.101	91.901	92.301	92.201	91.301	90.801	89.601	89.601	89.501	89.801	91.901	90.701	91.601	90.001	90.701	90.201	89.601	88.901	89.001	88.901	88.901	88.901	88.901	89.001	90.001	89.201	88.401	90.101	90.401	89.501	91.201	91.201	91.001	90.901	90.601	89.701	90.401	90.401	90.301	90.701	91.101	90.301	90.301	90.901	90.901	90.801	90.601	90.501	92.201
>MW656054_1_Pigeon_circovirus_isolate_TSP12_7_complete_genome	92.101	91.901	92.301	92.201	91.301	90.801	89.501	89.501	89.501	89.801	91.901	90.601	91.601	90.001	90.601	90.101	89.501	88.901	88.901	88.801	88.901	88.901	88.801	89.001	89.901	89.101	88.301	90.001	90.401	89.401	91.101	91.101	91.001	90.901	90.501	89.601	90.301	90.401	90.201	90.601	91.101	90.201	90.201	90.801	90.801	90.701	90.601	90.501	92.101
>MW656074_1_Pigeon_circovirus_isolate_TSP14_10_complete_genome	92.101	91.901	92.301	92.201	91.301	90.801	89.601	89.601	89.501	89.901	91.901	90.701	91.601	90.001	90.701	90.201	89.601	88.901	89.001	88.901	88.901	88.901	88.901	89.001	89.901	89.201	88.401	90.001	90.301	89.401	91.201	91.201	90.901	90.901	90.601	89.701	90.401	90.301	90.301	90.701	91.101	90.301	90.301	90.801	90.801	90.701	90.601	90.401	92.201
>MW656050_1_Pigeon_circovirus_isolate_TSP12_1_complete_genome	92.101	91.901	92.301	92.201	91.301	90.801	89.601	89.601	89.501	89.801	91.901	90.701	91.601	90.001	90.701	90.201	89.601	88.901	89.001	88.901	88.901	88.901	88.901	89.001	89.901	89.201	88.401	90.001	90.301	89.401	91.201	91.201	90.901	90.901	90.601	89.701	90.401	90.301	90.301	90.701	91.101	90.301	90.301	90.801	90.801	90.701	90.601	90.401	92.201
>MW656073_1_Pigeon_circovirus_isolate_TSP14_9_complete_genome	92.201	92.001	92.401	92.301	91.401	90.901	89.701	89.701	89.601	89.901	92.001	90.801	91.701	90.101	90.801	90.301	89.601	89.001	89.101	88.901	89.001	89.001	88.901	89.101	90.101	89.301	88.501	90.101	90.301	89.501	91.301	91.301	91.001	91.001	90.501	89.701	90.401	90.301	90.401	90.801	91.001	90.401	90.401	91.001	91.001	90.901	90.601	90.601	92.301
>MW656071_1_Pigeon_circovirus_isolate_TSP14_7_complete_genome	92.201	92.001	92.401	92.301	91.401	90.901	89.701	89.701	89.601	89.901	92.001	90.801	91.701	90.101	90.801	90.301	89.601	89.001	89.101	88.901	89.001	89.001	88.901	89.101	90.101	89.301	88.501	90.101	90.301	89.501	91.301	91.301	91.001	91.001	90.501	89.701	90.401	90.301	90.401	90.801	91.001	90.401	90.401	91.001	91.001	90.901	90.601	90.601	92.301
>MW656056_1_Pigeon_circovirus_isolate_TSP12_10_complete_genome	92.201	92.001	92.401	92.301	91.401	90.901	89.601	89.601	89.601	89.901	92.001	90.701	91.701	90.101	90.701	90.201	89.601	89.001	89.001	88.901	88.901	89.001	88.901	89.101	90.001	89.201	88.401	90.101	90.401	89.501	91.201	91.201	91.001	91.001	90.501	89.701	90.401	90.401	90.301	90.701	91.101	90.301	90.301	90.901	90.901	90.801	90.701	90.601	92.201
>MW656055_1_Pigeon_circovirus_isolate_TSP12_8_complete_genome	92.101	91.901	92.301	92.201	91.301	90.801	89.601	89.601	89.501	89.901	91.901	90.601	91.701	90.101	90.701	90.201	89.601	89.001	89.001	88.901	88.901	89.001	88.901	89.101	90.001	89.201	88.401	90.101	90.401	89.501	91.201	91.201	91.001	91.001	90.501	89.701	90.401	90.301	90.201	90.601	91.001	90.201	90.201	90.801	90.801	90.701	90.601	90.501	92.101
>MW656051_1_Pigeon_circovirus_isolate_TSP12_2_complete_genome	92.201	92.001	92.401	92.301	91.401	90.901	89.601	89.601	89.601	89.901	92.001	90.701	91.701	90.101	90.701	90.201	89.601	89.101	89.101	89.001	89.001	89.101	89.001	89.201	90.001	89.201	88.401	90.001	90.301	89.401	91.201	91.201	91.001	91.001	90.401	89.701	90.401	90.301	90.301	90.701	91.001	90.301	90.301	90.901	90.901	90.801	90.701	90.701	92.201
>MW656068_1_Pigeon_circovirus_isolate_TSP14_4_complete_genome	92.101	91.901	92.301	92.201	91.301	90.801	89.601	89.601	89.501	89.801	91.901	90.701	91.601	90.001	90.701	90.201	89.701	89.001	89.101	88.901	89.001	89.001	88.901	89.101	90.001	89.201	88.401	90.101	90.301	89.501	91.201	91.201	90.901	90.901	90.501	89.801	90.501	90.301	90.301	90.701	91.001	90.301	90.301	90.901	90.901	90.801	90.701	90.601	92.201
>MW656052_1_Pigeon_circovirus_isolate_TSP12_5_complete_genome	92.101	91.901	92.301	92.201	91.301	90.801	89.601	89.601	89.501	89.801	91.901	90.701	91.601	90.001	90.701	90.201	89.701	89.001	89.101	88.901	89.001	89.001	88.901	89.101	90.001	89.201	88.401	90.101	90.301	89.501	91.201	91.201	90.901	90.901	90.501	89.801	90.501	90.301	90.301	90.701	91.001	90.301	90.301	90.901	90.901	90.801	90.701	90.601	92.201
>MW656066_1_Pigeon_circovirus_isolate_TSP14_2_complete_genome	92.301	92.101	92.501	92.401	91.501	91.001	89.701	89.701	89.701	90.001	92.101	90.801	91.801	90.201	90.801	90.301	89.601	89.101	89.101	89.001	89.001	89.101	89.001	89.201	90.101	89.301	88.501	90.001	90.301	89.401	91.301	91.301	91.001	91.101	90.501	89.701	90.401	90.301	90.401	90.801	91.101	90.401	90.401	90.901	90.901	90.801	90.701	90.601	92.301
>MW656065_1_Pigeon_circovirus_isolate_TSP14_1_complete_genome	92.201	92.001	92.401	92.301	91.401	90.901	89.701	89.701	89.601	89.901	92.001	90.801	91.701	90.101	90.801	90.301	89.701	89.101	89.201	89.001	89.101	89.101	89.001	89.201	90.001	89.301	88.501	90.001	90.201	89.401	91.301	91.301	90.901	91.001	90.501	89.801	90.501	90.201	90.401	90.801	91.001	90.401	90.401	90.901	90.901	90.801	90.701	90.601	92.301
>MW656034_1_Pigeon_circovirus_isolate_TSP8_9_complete_genome	92.301	92.001	92.401	92.301	91.401	90.901	89.701	89.701	89.701	90.001	92.001	90.801	91.701	90.201	90.801	90.301	89.601	89.101	89.101	89.001	89.001	89.101	89.001	89.201	90.101	89.301	88.501	90.101	90.401	89.501	91.301	91.301	91.001	91.001	90.501	89.701	90.401	90.301	90.401	90.801	91.001	90.401	90.401	91.001	91.001	90.901	90.601	90.601	92.301
>MW656033_1_Pigeon_circovirus_isolate_TSP8_8_complete_genome	92.201	91.901	92.301	92.201	91.301	90.801	89.601	89.601	89.601	89.901	91.901	90.701	91.601	90.101	90.701	90.201	89.601	89.001	89.001	88.901	88.901	89.001	88.901	89.101	90.001	89.201	88.401	90.101	90.401	89.501	91.201	91.201	90.901	90.901	90.601	89.701	90.401	90.301	90.301	90.701	91.001	90.301	90.301	90.901	90.901	90.801	90.601	90.501	92.201
>MW656087_1_Pigeon_circovirus_isolate_TSP16_8_complete_genome	92.301	92.101	92.501	92.401	91.501	91.001	89.801	89.801	89.701	90.101	92.101	90.801	91.901	90.301	90.901	90.401	89.801	89.201	89.201	89.101	89.101	89.201	89.101	89.301	90.201	89.501	88.701	90.201	90.501	89.601	91.401	91.401	91.101	91.201	90.801	89.901	90.601	90.401	90.401	90.901	91.201	90.401	90.401	90.901	90.901	90.901	90.801	90.601	92.301
>MW656081_1_Pigeon_circovirus_isolate_TSP16_2_complete_genome	92.201	91.901	92.301	92.201	91.301	90.801	89.601	89.601	89.601	89.901	92.001	90.701	91.701	90.101	90.701	90.301	89.801	89.101	89.201	89.001	89.101	89.101	89.001	89.201	90.001	89.301	88.501	90.101	90.301	89.501	91.301	91.301	90.901	91.001	90.701	89.901	90.601	90.201	90.301	90.801	91.001	90.301	90.301	90.801	90.801	90.801	90.701	90.501	92.201
>MW656086_1_Pigeon_circovirus_isolate_TSP16_7_complete_genome	92.101	91.901	92.301	92.201	91.301	90.801	89.601	89.601	89.501	89.901	91.901	90.601	91.701	90.101	90.701	90.201	89.601	89.001	89.001	88.901	88.901	89.001	88.901	89.101	90.001	89.301	88.501	90.101	90.401	89.501	91.201	91.201	91.001	91.001	90.601	89.701	90.401	90.301	90.201	90.701	91.001	90.201	90.201	90.801	90.801	90.801	90.601	90.501	92.101
>MW656082_1_Pigeon_circovirus_isolate_TSP16_3_complete_genome	92.101	91.801	92.201	92.101	91.201	90.701	89.501	89.501	89.501	89.801	91.901	90.601	91.601	90.001	90.601	90.201	89.601	88.901	89.001	88.901	88.901	88.901	88.901	89.001	90.001	89.201	88.401	90.101	90.401	89.501	91.201	91.201	91.001	90.901	90.701	89.701	90.401	90.301	90.201	90.701	91.001	90.201	90.201	90.801	90.801	90.801	90.501	90.401	92.101
>MW656084_1_Pigeon_circovirus_isolate_TSP16_5_complete_genome	92.101	91.901	92.301	92.201	91.301	90.801	89.601	89.601	89.501	89.901	91.901	90.601	91.701	90.101	90.701	90.201	89.601	89.101	89.101	89.001	89.001	89.101	89.001	89.201	90.001	89.301	88.501	90.001	90.401	89.401	91.201	91.201	91.101	91.001	90.601	89.701	90.401	90.301	90.201	90.701	91.001	90.201	90.201	90.801	90.801	90.801	90.601	90.601	92.101
>MW656083_1_Pigeon_circovirus_isolate_TSP16_4_complete_genome	92.201	92.001	92.401	92.301	91.401	90.901	89.701	89.701	89.601	90.001	92.001	90.701	91.801	90.201	90.801	90.301	89.601	89.101	89.101	89.001	89.001	89.101	89.001	89.201	90.101	89.401	88.601	90.101	90.401	89.501	91.301	91.301	91.101	91.101	90.601	89.701	90.401	90.301	90.301	90.801	91.001	90.301	90.301	90.901	90.901	90.901	90.601	90.601	92.201
>MW656080_1_Pigeon_circovirus_isolate_TSP16_1_complete_genome	92.201	92.001	92.401	92.301	91.401	90.901	89.701	89.701	89.601	90.001	92.001	90.701	91.801	90.201	90.801	90.301	89.601	89.101	89.101	89.001	89.001	89.101	89.001	89.201	90.101	89.401	88.601	90.101	90.401	89.501	91.301	91.301	91.101	91.101	90.601	89.701	90.401	90.301	90.301	90.801	91.001	90.301	90.301	90.901	90.901	90.901	90.601	90.601	92.201
>MW656088_1_Pigeon_circovirus_isolate_TSP16_10_complete_genome	91.601	91.701	91.801	91.701	90.701	90.201	89.301	89.301	89.201	89.901	91.501	90.301	91.401	90.101	90.501	90.001	89.301	89.201	88.801	88.801	88.801	88.901	88.801	88.901	89.701	88.801	88.001	89.701	90.001	89.001	90.901	90.901	90.501	90.701	90.101	89.301	90.001	89.701	90.101	90.101	90.401	89.701	89.701	90.301	90.301	90.501	90.401	90.001	91.601
>MW656085_1_Pigeon_circovirus_isolate_TSP16_6_complete_genome	92.301	92.101	92.301	92.201	91.301	90.801	89.701	89.701	89.701	90.101	92.001	90.801	91.701	90.101	90.801	90.401	89.901	89.101	89.001	89.001	89.001	89.101	89.001	89.201	90.201	89.401	88.601	90.201	90.601	89.701	91.401	91.401	91.301	91.201	90.701	89.801	90.501	90.501	90.301	90.801	91.001	90.401	90.401	90.901	90.901	90.901	90.701	90.601	92.201
>MW656047_1_Pigeon_circovirus_isolate_TSP11_6_complete_genome	92.301	92.001	92.401	92.301	91.401	90.901	89.701	89.701	89.701	90.001	92.001	90.801	91.701	90.201	90.801	90.301	89.801	89.201	89.301	89.201	89.201	89.301	89.201	89.401	90.101	89.201	88.401	90.201	90.501	89.501	91.301	91.301	90.901	91.001	90.701	89.901	90.601	90.301	90.501	90.801	91.101	90.401	90.401	90.901	90.901	90.801	90.701	90.601	92.301
>KF738850_1_Columbid_circovirus_isolate_PL177_complete_genome	91.501	91.701	92.101	91.901	90.901	90.401	89.601	89.501	89.401	89.301	91.801	90.701	91.501	90.501	90.801	90.401	89.701	89.301	89.301	89.301	89.401	89.401	89.301	89.501	90.301	89.601	88.801	90.001	90.301	89.401	91.601	91.601	91.201	91.401	90.301	90.001	90.701	90.301	90.401	90.201	90.401	90.001	90.001	90.201	90.201	90.901	90.701	90.601	91.801
>DQ915950_1_Columbid_circovirus_isolate_Ita_4B_complete_genome	89.401	90.001	90.401	90.501	88.201	88.001	88.201	88.101	88.101	87.701	89.501	88.601	89.301	88.001	88.901	88.501	88.301	87.501	87.101	87.001	86.901	87.001	86.901	87.101	87.401	87.201	86.301	87.401	87.701	87.501	89.001	89.001	88.701	88.701	88.501	87.601	88.401	87.501	88.301	88.301	88.001	88.001	88.001	88.301	88.301	88.201	88.101	88.801	89.801
>DQ915956_1_Columbid_circovirus_isolate_Bel_936_complete_genome	91.701	91.901	92.201	92.101	91.001	90.601	89.601	89.701	89.601	89.601	91.901	91.101	91.001	90.301	90.101	90.601	90.301	89.101	88.601	89.101	89.101	89.201	89.101	89.301	89.801	90.001	89.201	90.401	90.701	89.801	91.401	91.401	91.401	90.901	90.501	90.501	91.201	90.401	89.801	90.201	90.301	90.401	90.401	90.401	90.401	90.601	90.001	90.301	91.701
>KF738867_1_Columbid_circovirus_isolate_PL66B_complete_genome	92.901	93.001	93.001	92.901	91.701	91.401	90.901	90.901	90.801	90.901	93.001	92.901	92.401	92.201	91.001	91.801	91.001	89.501	89.501	89.401	89.501	89.501	89.401	89.601	91.601	91.501	90.801	92.201	92.501	91.101	93.101	93.101	93.001	92.301	91.601	92.501	93.301	92.601	92.001	92.001	91.701	92.201	92.201	92.401	92.401	92.601	91.801	92.301	93.001
>KF738847_1_Columbid_circovirus_isolate_PL14_complete_genome	92.201	92.401	92.401	92.301	91.501	91.301	90.601	90.401	90.301	90.501	92.401	92.301	91.901	92.001	90.401	91.601	90.801	89.101	89.201	89.101	89.201	89.201	89.101	89.301	91.101	90.901	90.201	91.601	91.901	90.601	92.501	92.501	92.501	91.701	91.001	92.001	92.801	92.101	91.501	91.601	91.201	91.401	91.401	92.001	92.001	92.001	91.301	91.801	92.501
>MW656019_1_Pigeon_circovirus_isolate_TSPSwab9_4_complete_genome	92.001	92.401	92.501	92.301	91.401	91.101	90.701	90.501	90.401	90.601	92.401	92.401	92.001	91.901	90.601	91.201	90.701	89.201	89.501	89.401	89.501	89.501	89.401	89.601	91.001	91.001	90.401	91.701	92.001	90.701	92.501	92.501	92.301	91.801	91.201	92.001	92.701	91.901	91.401	91.201	91.001	91.701	91.701	91.901	91.901	92.101	91.201	91.401	92.501
>MW656018_1_Pigeon_circovirus_isolate_TSPSwab9_3_complete_genome	91.901	92.301	92.401	92.201	91.301	91.001	90.601	90.401	90.301	90.501	92.301	92.201	91.901	91.801	90.501	91.101	90.601	89.101	89.401	89.301	89.401	89.401	89.301	89.501	90.901	90.901	90.301	91.601	91.801	90.501	92.401	92.401	92.201	91.701	91.101	91.901	92.601	91.801	91.201	91.101	90.901	91.601	91.601	91.801	91.801	92.001	91.001	91.201	92.401
>MW656015_1_Pigeon_circovirus_isolate_TSP_swab9_complete_genome	92.101	92.401	92.601	92.301	91.501	91.201	90.701	90.501	90.401	90.601	92.401	92.401	92.001	91.901	90.601	91.201	90.701	89.201	89.501	89.401	89.501	89.501	89.401	89.601	91.001	91.001	90.401	91.701	92.001	90.701	92.501	92.501	92.301	91.801	91.201	92.001	92.701	91.901	91.401	91.201	91.001	91.801	91.801	91.901	91.901	92.101	91.201	91.301	92.501
>MW656016_1_Pigeon_circovirus_isolate_TSPSwab9_1_complete_genome	92.101	92.501	92.601	92.401	91.501	91.201	90.801	90.601	90.501	90.701	92.501	92.501	92.101	92.001	90.701	91.301	90.801	89.301	89.601	89.501	89.501	89.601	89.501	89.701	91.101	91.101	90.501	91.801	92.101	90.801	92.601	92.601	92.401	91.901	91.301	92.101	92.801	92.001	91.501	91.301	91.101	91.801	91.801	92.001	92.001	92.201	91.301	91.501	92.601
>MW656014_1_Pigeon_circovirus_isolate_TSP20_9_complete_genome	92.001	92.401	92.501	92.201	91.401	91.101	90.701	90.501	90.401	90.601	92.301	92.301	92.001	91.801	90.501	91.201	90.801	89.201	89.501	89.401	89.501	89.501	89.401	89.601	91.001	91.001	90.301	91.701	92.001	90.701	92.401	92.401	92.301	91.801	91.101	92.001	92.801	91.901	91.301	91.201	90.901	91.601	91.601	91.901	91.901	92.201	91.201	91.401	92.501
>MW656011_1_Pigeon_circovirus_isolate_TSP20_5_complete_genome	91.901	92.301	92.401	92.201	91.301	91.001	90.601	90.401	90.301	90.501	92.301	92.201	91.901	91.801	90.501	91.101	90.801	89.201	89.501	89.401	89.401	89.501	89.401	89.601	91.001	90.901	90.301	91.701	91.901	90.601	92.401	92.401	92.301	91.701	91.101	92.001	92.701	91.901	91.201	91.101	90.901	91.601	91.601	91.901	91.901	92.201	91.101	91.401	92.401
>MW656009_1_Pigeon_circovirus_isolate_TSP20_2_complete_genome	91.901	92.301	92.401	92.201	91.301	91.001	90.601	90.401	90.301	90.501	92.301	92.201	91.901	91.801	90.501	91.101	90.801	89.201	89.501	89.401	89.401	89.501	89.401	89.601	91.001	90.901	90.301	91.701	91.901	90.601	92.401	92.401	92.301	91.701	91.101	92.001	92.701	91.901	91.201	91.101	90.901	91.601	91.601	91.901	91.901	92.201	91.101	91.401	92.401
>MW656010_1_Pigeon_circovirus_isolate_TSP20_3_complete_genome	91.901	92.301	92.401	92.201	91.301	91.001	90.601	90.401	90.301	90.501	92.301	92.201	91.901	91.801	90.501	91.101	90.901	89.201	89.501	89.401	89.401	89.501	89.401	89.601	91.001	90.901	90.301	91.801	92.001	90.701	92.401	92.401	92.301	91.701	91.201	92.101	92.801	92.001	91.201	91.101	91.001	91.601	91.601	91.901	91.901	92.201	91.201	91.401	92.401
>MW656013_1_Pigeon_circovirus_isolate_TSP20_8_complete_genome	91.901	92.301	92.401	92.201	91.301	91.001	90.601	90.401	90.301	90.501	92.301	92.201	91.901	91.801	90.501	91.101	90.801	89.101	89.401	89.301	89.301	89.401	89.301	89.501	91.001	90.901	90.301	91.801	92.101	90.701	92.401	92.401	92.401	91.701	91.301	92.001	92.701	92.101	91.201	91.101	91.101	91.601	91.601	91.901	91.901	92.201	91.101	91.301	92.401
>MW656008_1_Pigeon_circovirus_isolate_TSP20_1_complete_genome	92.001	92.401	92.501	92.201	91.401	91.101	90.701	90.501	90.401	90.601	92.301	92.301	92.001	91.801	90.501	91.201	90.801	89.101	89.401	89.301	89.401	89.401	89.301	89.501	91.001	91.001	90.301	91.701	92.101	90.701	92.401	92.401	92.301	91.801	91.301	92.001	92.801	92.001	91.301	91.201	91.101	91.601	91.601	91.801	91.801	92.101	91.201	91.201	92.501
>MW656012_1_Pigeon_circovirus_isolate_TSP20_7_complete_genome	92.001	92.401	92.501	92.301	91.401	91.101	90.701	90.501	90.401	90.601	92.401	92.301	92.001	91.901	90.601	91.201	90.901	89.201	89.501	89.401	89.401	89.501	89.401	89.601	91.001	91.001	90.401	91.801	92.001	90.701	92.501	92.501	92.301	91.801	91.301	92.101	92.801	92.001	91.301	91.201	91.101	91.701	91.701	91.901	91.901	92.201	91.201	91.301	92.501
>MW656001_1_Pigeon_circovirus_isolate_TSP19_1_complete_genome	92.001	92.501	92.601	92.301	91.501	91.201	90.801	90.601	90.501	90.701	92.401	92.401	92.101	91.901	90.601	91.301	90.901	89.201	89.501	89.401	89.501	89.501	89.401	89.601	91.101	91.101	90.401	91.801	92.201	90.801	92.501	92.501	92.401	91.901	91.401	92.101	92.901	92.101	91.401	91.301	91.201	91.701	91.701	91.901	91.901	92.201	91.301	91.301	92.601
>MW655993_1_Pigeon_circovirus_isolate_TSP9_2_complete_genome	92.001	92.501	92.601	92.301	91.501	91.201	90.801	90.601	90.501	90.701	92.401	92.401	92.101	91.901	90.601	91.301	90.901	89.201	89.501	89.401	89.501	89.501	89.401	89.601	91.101	91.101	90.401	91.801	92.201	90.801	92.501	92.501	92.401	91.901	91.401	92.101	92.901	92.101	91.401	91.301	91.201	91.701	91.701	91.901	91.901	92.201	91.301	91.301	92.601
>MW656002_1_Pigeon_circovirus_isolate_TSP19_2_complete_genome	92.001	92.401	92.501	92.301	91.401	91.101	90.701	90.501	90.401	90.601	92.401	92.301	92.001	91.901	90.601	91.201	90.801	89.201	89.501	89.401	89.401	89.501	89.401	89.601	91.001	91.001	90.401	91.801	92.101	90.701	92.501	92.501	92.401	91.801	91.401	92.101	92.801	92.101	91.301	91.201	91.201	91.701	91.701	91.901	91.901	92.101	91.201	91.301	92.501
>MW655997_1_Pigeon_circovirus_isolate_TSP9_7_complete_genome	91.901	92.301	92.401	92.201	91.301	91.001	90.601	90.401	90.301	90.501	92.301	92.201	91.901	91.801	90.501	91.101	90.801	89.201	89.501	89.401	89.401	89.501	89.401	89.601	91.001	90.901	90.301	91.801	92.101	90.701	92.401	92.401	92.401	91.701	91.301	92.101	92.801	92.101	91.201	91.101	91.101	91.601	91.601	91.901	91.901	92.101	91.201	91.401	92.401
>MW655992_1_Pigeon_circovirus_isolate_TSP8_6_complete_genome	91.901	92.401	92.501	92.201	91.401	91.101	90.701	90.501	90.401	90.601	92.301	92.301	92.001	91.801	90.501	91.201	90.901	89.201	89.501	89.401	89.501	89.501	89.401	89.601	91.001	91.001	90.301	91.801	92.201	90.801	92.401	92.401	92.401	91.801	91.301	92.101	92.901	92.101	91.301	91.201	91.101	91.601	91.601	91.901	91.901	92.201	91.301	91.401	92.501
>MW655996_1_Pigeon_circovirus_isolate_TSP9_6_complete_genome	91.801	92.201	92.301	92.101	91.201	90.901	90.501	90.301	90.201	90.401	92.201	92.101	91.801	91.701	90.401	91.001	90.701	89.101	89.401	89.301	89.301	89.401	89.301	89.501	90.901	90.801	90.201	91.701	92.001	90.601	92.301	92.301	92.301	91.601	91.201	92.001	92.701	92.001	91.101	91.001	91.001	91.501	91.501	91.801	91.801	92.001	91.101	91.301	92.301
>MW656006_1_Pigeon_circovirus_isolate_TSP19_7_complete_genome	92.001	92.501	92.601	92.301	91.501	91.201	90.801	90.601	90.501	90.701	92.401	92.401	92.101	91.901	90.601	91.301	90.901	89.201	89.501	89.401	89.501	89.501	89.401	89.601	91.101	91.101	90.401	91.901	92.201	90.901	92.501	92.501	92.401	91.901	91.301	92.101	92.901	92.101	91.401	91.301	91.101	91.701	91.701	92.001	92.001	92.301	91.301	91.401	92.601
>MW655994_1_Pigeon_circovirus_isolate_TSP9_3_complete_genome	92.001	92.401	92.501	92.301	91.401	91.101	90.701	90.501	90.401	90.601	92.401	92.301	92.001	91.901	90.601	91.201	90.801	89.201	89.501	89.401	89.401	89.501	89.401	89.601	91.101	91.001	90.401	91.901	92.101	90.801	92.501	92.501	92.401	91.801	91.301	92.101	92.801	92.101	91.301	91.201	91.101	91.701	91.701	92.001	92.001	92.201	91.201	91.401	92.501
>MW655995_1_Pigeon_circovirus_isolate_TSP9_4_complete_genome	91.901	92.401	92.501	92.201	91.401	91.101	90.701	90.501	90.401	90.601	92.301	92.301	92.001	91.801	90.501	91.201	90.801	89.101	89.401	89.301	89.401	89.401	89.301	89.501	91.001	91.001	90.301	91.801	92.101	90.801	92.401	92.401	92.301	91.801	91.201	92.001	92.801	92.001	91.301	91.201	91.001	91.601	91.601	91.901	91.901	92.201	91.201	91.301	92.501
>MW656003_1_Pigeon_circovirus_isolate_TSP19_3_complete_genome	92.001	92.401	92.501	92.301	91.401	91.101	90.701	90.501	90.401	90.601	92.401	92.301	92.001	91.901	90.601	91.201	90.801	89.301	89.601	89.501	89.501	89.601	89.501	89.701	91.101	91.001	90.401	91.801	92.001	90.701	92.501	92.501	92.401	91.801	91.201	92.101	92.801	92.001	91.301	91.201	91.001	91.701	91.701	92.001	92.001	92.201	91.201	91.501	92.501
>MW656007_1_Pigeon_circovirus_isolate_TSP19_10_complete_genome	92.101	92.501	92.601	92.401	91.501	91.201	90.801	90.601	90.501	90.701	92.501	92.401	92.101	92.001	90.701	91.301	90.801	89.301	89.601	89.501	89.501	89.601	89.501	89.701	91.101	91.101	90.501	91.801	92.101	90.701	92.601	92.601	92.501	91.901	91.401	92.101	92.801	92.101	91.401	91.301	91.201	91.801	91.801	92.001	92.001	92.201	91.201	91.401	92.601
>MW656005_1_Pigeon_circovirus_isolate_TSP19_5_complete_genome	92.001	92.401	92.501	92.301	91.401	91.101	90.701	90.501	90.401	90.601	92.401	92.301	92.001	91.901	90.601	91.201	90.801	89.201	89.501	89.401	89.401	89.501	89.401	89.601	91.101	91.001	90.401	91.801	92.101	90.701	92.501	92.501	92.501	91.801	91.301	92.001	92.701	92.101	91.301	91.201	91.101	91.701	91.701	92.001	92.001	92.201	91.101	91.401	92.501
>MW656004_1_Pigeon_circovirus_isolate_TSP19_4_complete_genome	92.001	92.501	92.601	92.301	91.501	91.201	90.801	90.601	90.501	90.701	92.401	92.401	92.101	91.901	90.601	91.301	90.801	89.201	89.501	89.401	89.501	89.501	89.401	89.601	91.101	91.101	90.401	91.801	92.201	90.801	92.501	92.501	92.501	91.901	91.301	92.001	92.801	92.101	91.401	91.301	91.101	91.701	91.701	92.001	92.001	92.301	91.201	91.401	92.601
>MW655998_1_Pigeon_circovirus_isolate_TSP9_10_complete_genome	91.901	92.401	92.501	92.201	91.401	91.101	90.701	90.501	90.401	90.601	92.301	92.301	92.001	91.801	90.501	91.201	90.701	89.101	89.401	89.301	89.401	89.401	89.301	89.501	91.001	91.001	90.301	91.701	92.101	90.701	92.401	92.401	92.401	91.801	91.201	91.901	92.701	92.001	91.301	91.201	91.001	91.601	91.601	91.901	91.901	92.201	91.101	91.301	92.501
>MW656017_1_Pigeon_circovirus_isolate_TSPSwab9_2_complete_genome	91.901	92.401	92.401	92.201	91.301	91.001	90.701	90.501	90.401	90.601	92.201	92.101	91.901	91.601	90.501	91.101	90.701	89.201	89.501	89.301	89.401	89.401	89.301	89.501	90.901	90.901	90.201	91.601	91.801	90.401	92.201	92.201	92.001	91.701	91.201	91.701	92.401	91.601	91.301	91.301	91.101	91.801	91.801	91.901	91.901	91.901	91.301	91.101	92.401
>JN183455_1_Columbid_circovirus_strain_fj1_complete_genome	92.201	93.501	93.301	93.101	92.501	92.101	91.501	91.801	91.701	92.301	93.201	92.601	92.701	91.801	90.801	91.901	90.201	89.501	89.701	89.701	89.501	89.601	89.501	89.701	90.601	90.701	90.001	90.701	91.001	90.601	92.101	92.101	92.301	92.101	91.801	91.301	92.001	91.801	91.401	91.901	91.701	92.001	92.001	92.401	92.401	91.801	91.801	91.601	92.801
>KX108821_1_Pigeon_circovirus_strain_GF88_GuangDong_2014_complete_genome	92.001	91.901	91.801	91.601	91.101	90.701	89.901	90.001	89.901	89.501	91.401	90.501	91.001	90.001	91.201	90.401	90.001	88.401	88.501	88.601	88.401	88.501	88.401	88.601	89.201	89.101	88.501	89.601	89.701	89.101	90.901	90.901	90.801	90.801	89.901	89.401	90.101	89.801	90.401	89.901	89.701	90.201	90.201	90.301	90.301	89.901	90.001	89.501	91.701
>KX108798_1_Pigeon_circovirus_strain_GF54_GuangDong_2014_complete_genome	92.601	92.501	92.401	92.201	91.401	91.101	90.501	90.401	90.301	90.001	91.901	91.301	91.201	90.401	91.501	91.001	90.401	89.101	89.101	89.301	89.101	89.201	89.101	89.301	89.801	89.601	88.901	90.101	90.201	89.601	91.501	91.501	91.401	91.301	90.401	90.001	90.801	90.401	90.901	90.601	90.401	90.701	90.701	90.701	90.701	90.601	90.701	90.001	92.401
>KX108790_1_Pigeon_circovirus_strain_GF85_Guangdong_2014_complete_genome	92.601	92.801	92.601	92.401	91.701	91.401	90.901	90.801	90.801	90.301	92.201	91.501	91.501	91.001	91.501	91.201	90.401	89.001	89.101	89.001	89.001	89.101	89.001	89.201	90.001	89.701	89.001	90.201	90.301	89.701	91.701	91.701	91.501	91.601	90.701	90.301	91.001	90.701	91.201	91.001	90.601	91.101	91.101	91.101	91.101	90.801	90.901	90.101	92.501
>KX108781_1_Pigeon_circovirus_strain_GF86_GuangDong_2014_complete_genome	92.301	92.401	92.401	92.201	91.401	91.101	90.401	90.501	90.401	90.001	91.601	90.801	91.101	90.001	91.301	90.401	90.101	88.701	88.701	88.801	88.701	88.701	88.601	88.801	89.501	89.301	88.601	89.901	90.001	89.301	91.301	91.301	91.001	91.201	90.301	89.701	90.401	90.001	90.601	90.201	90.201	90.401	90.401	90.601	90.601	90.201	90.301	89.701	92.001
>KX108818_1_Pigeon_circovirus_strain_GF90_GuangDong_2014_complete_genome	92.301	92.701	92.701	92.601	91.801	91.501	90.901	90.901	90.901	90.401	92.401	91.401	91.701	91.201	91.701	91.201	90.301	89.401	89.301	89.401	89.301	89.301	89.201	89.401	90.301	89.901	89.101	90.401	90.501	90.101	91.901	91.901	91.801	91.501	90.801	90.401	91.301	90.801	91.201	91.001	91.001	90.901	90.901	91.101	91.101	91.001	90.801	90.301	92.901
>KX108813_1_Pigeon_circovirus_strain_GF87_GuangDong_2014_complete_genome	93.701	93.401	93.901	93.701	92.601	92.301	91.701	91.601	91.601	91.201	93.101	92.401	92.601	91.701	92.201	92.001	91.201	89.701	89.701	89.601	89.701	89.701	89.601	89.801	90.701	90.601	89.801	91.101	91.201	90.501	92.701	92.701	92.001	92.401	91.401	91.101	91.801	91.601	91.901	91.901	91.301	91.501	91.501	91.801	91.801	91.501	91.601	91.001	93.601
>KX108810_1_Pigeon_circovirus_strain_SF335_ShangHai_2014_complete_genome	93.901	94.301	93.701	93.501	92.801	92.501	91.901	92.201	92.201	92.101	93.801	92.701	93.001	92.401	92.401	92.201	91.501	91.101	91.101	91.201	91.201	91.201	91.101	91.301	91.601	91.201	90.301	91.601	91.701	91.101	93.001	93.001	92.801	92.301	91.901	91.701	92.501	92.101	91.801	92.101	91.601	91.601	91.601	91.901	91.901	91.901	92.001	91.401	93.101
>KX108784_1_Pigeon_circovirus_strain_JF6_JiangSu_2014_complete_genome	94.001	94.701	94.401	94.101	93.401	93.201	92.201	92.301	92.301	92.601	94.001	93.501	93.401	92.501	92.001	92.401	91.701	90.601	90.801	90.601	90.601	90.701	90.601	90.801	91.801	91.501	90.701	92.401	92.501	91.501	93.101	93.101	93.201	93.001	92.901	92.601	93.301	92.701	92.601	93.101	92.801	93.001	93.001	93.401	93.401	92.901	92.801	92.301	93.701
>MW181980_1_Pigeon_circovirus_strain_YB3_SN_2018_complete_genome	91.501	92.301	91.901	91.601	90.601	90.501	89.301	89.401	89.401	90.201	91.101	90.901	90.301	89.701	89.601	89.501	89.301	88.501	88.601	88.401	88.401	88.501	88.401	88.601	88.901	88.801	88.001	89.701	89.801	88.901	90.201	90.201	90.401	90.001	90.001	89.801	90.501	89.801	90.101	90.801	90.501	90.201	90.201	90.801	90.801	90.301	90.101	89.701	91.501
>MW181979_1_Pigeon_circovirus_strain_YB2_SN_2018_complete_genome	91.201	91.901	91.501	91.301	90.201	90.101	89.101	89.101	89.201	89.701	90.701	90.401	90.201	89.401	89.401	89.401	89.201	88.001	88.501	88.401	88.401	88.401	88.301	88.501	88.601	88.301	87.601	89.301	89.401	88.501	89.901	89.901	90.001	89.801	89.901	89.401	90.101	89.401	89.801	90.301	90.001	90.101	90.101	90.801	90.801	90.001	89.901	89.601	91.101
>MW181967_1_Pigeon_circovirus_strain_QD5_SN_2018_complete_genome	91.401	92.601	92.201	92.001	90.501	90.301	89.701	89.701	89.801	90.301	91.401	90.801	90.401	89.401	89.901	89.501	89.501	88.301	88.601	88.401	88.401	88.501	88.401	88.601	89.201	89.301	88.601	89.501	89.701	89.101	90.501	90.501	90.701	90.401	90.401	89.801	90.501	89.801	89.901	90.401	90.301	90.301	90.301	90.701	90.701	90.201	90.101	89.701	91.401
>MW181966_1_Pigeon_circovirus_strain_QD4_SN_2018_complete_genome	91.301	92.501	92.101	91.801	90.401	90.301	89.501	89.601	89.701	90.201	91.301	90.701	90.301	89.301	89.801	89.401	89.301	88.101	88.401	88.301	88.301	88.301	88.201	88.401	89.001	89.101	88.401	89.401	89.501	89.001	90.401	90.401	90.501	90.201	90.301	89.601	90.301	89.701	89.901	90.501	90.201	90.201	90.201	90.701	90.701	90.001	90.001	89.501	91.201
>MW181954_1_Pigeon_circovirus_strain_CA3_SN_2018_complete_genome	91.301	92.601	92.201	91.901	90.501	90.401	89.601	89.701	89.801	90.301	91.401	90.801	90.401	89.401	89.901	89.501	89.301	88.201	88.501	88.401	88.401	88.401	88.301	88.501	89.101	89.201	88.501	89.501	89.601	89.101	90.501	90.501	90.601	90.301	90.401	89.701	90.401	89.801	90.001	90.601	90.301	90.301	90.301	90.801	90.801	90.101	90.001	89.601	91.301
>MW181975_1_Pigeon_circovirus_strain_HP2_SN_2018_complete_genome	91.301	92.201	91.901	91.601	90.401	90.301	89.401	89.401	89.401	89.901	91.001	90.701	90.301	89.401	89.601	89.401	89.401	88.501	88.701	88.501	88.501	88.601	88.501	88.701	88.801	88.901	88.101	89.601	89.701	88.801	90.001	90.001	90.401	89.901	90.001	89.701	90.401	89.901	89.901	90.401	90.401	90.201	90.201	90.701	90.701	90.201	90.001	89.801	91.401
>MW181973_1_Pigeon_circovirus_strain_JZ1_SN_2018_complete_genome	91.501	92.401	92.001	91.801	90.601	90.501	89.501	89.501	89.601	90.101	91.201	90.901	90.501	89.601	89.901	89.501	89.601	88.501	88.901	88.701	88.701	88.701	88.601	88.801	88.901	88.901	88.201	89.601	89.801	88.901	90.201	90.201	90.401	90.001	90.101	89.901	90.601	89.901	90.101	90.701	90.701	90.301	90.301	90.801	90.801	90.201	90.301	89.801	91.501
>MW181934_1_Pigeon_circovirus_strain_YT2_SN_2017_complete_genome	91.301	92.401	92.001	91.701	90.501	90.301	89.501	89.501	89.501	90.001	91.101	90.901	90.401	89.501	89.701	89.501	89.401	88.401	88.601	88.401	88.401	88.501	88.401	88.601	88.901	88.801	88.101	89.701	89.901	89.001	90.101	90.101	90.501	90.001	90.001	89.901	90.501	89.901	90.001	90.501	90.501	90.301	90.301	90.801	90.801	90.301	90.101	89.801	91.501
>MW181962_1_Pigeon_circovirus_strain_WL7_SN_2018_complete_genome	91.301	92.401	91.901	91.601	90.401	90.301	89.301	89.401	89.401	90.001	91.001	90.801	90.301	89.401	89.601	89.601	89.401	88.401	88.501	88.301	88.301	88.401	88.301	88.501	88.801	88.801	88.101	89.501	89.701	88.801	90.001	90.001	90.401	90.001	89.901	89.801	90.501	89.901	90.001	90.501	90.501	90.201	90.201	90.601	90.601	90.301	90.001	89.701	91.401
>MW181961_1_Pigeon_circovirus_strain_WL6_SN_2018_complete_genome	91.401	92.401	91.901	91.701	90.501	90.401	89.401	89.401	89.501	90.001	91.101	90.801	90.401	89.501	89.701	89.601	89.501	88.401	88.501	88.401	88.401	88.401	88.301	88.501	88.901	88.801	88.101	89.601	89.701	88.801	90.101	90.101	90.401	90.001	89.901	89.901	90.501	89.901	90.101	90.501	90.601	90.201	90.201	90.701	90.701	90.401	90.101	89.701	91.401
>MW181960_1_Pigeon_circovirus_strain_WL5_SN_2018_complete_genome	91.201	92.201	91.701	91.501	90.301	90.201	89.301	89.301	89.401	89.801	90.901	90.601	90.201	89.301	89.501	89.401	89.401	88.201	88.301	88.201	88.201	88.201	88.101	88.301	88.701	88.601	88.001	89.401	89.501	88.601	89.901	89.901	90.201	89.901	89.701	89.701	90.301	89.701	89.901	90.301	90.401	90.001	90.001	90.501	90.501	90.201	89.901	89.601	91.201
>MW181947_1_Pigeon_circovirus_strain_WQ5_SN_2018_complete_genome	91.301	92.201	91.801	91.601	90.401	90.301	89.401	89.501	89.501	90.001	91.001	90.801	90.401	89.501	89.601	89.501	89.501	88.401	88.701	88.501	88.501	88.601	88.501	88.701	88.801	88.801	88.101	89.601	89.701	88.701	90.001	90.001	90.401	89.901	90.001	89.801	90.401	89.901	90.001	90.501	90.401	90.201	90.201	90.701	90.701	90.101	90.101	89.601	91.401
>MW181946_1_Pigeon_circovirus_strain_WQ4_SN_2018_complete_genome	91.301	92.201	91.801	91.601	90.401	90.301	89.401	89.501	89.501	90.001	91.001	90.801	90.401	89.501	89.601	89.501	89.501	88.401	88.701	88.501	88.501	88.601	88.501	88.701	88.801	88.801	88.101	89.601	89.701	88.701	90.001	90.001	90.401	89.901	90.001	89.801	90.401	89.901	90.001	90.501	90.401	90.201	90.201	90.701	90.701	90.101	90.101	89.601	91.401
>MW181935_1_Pigeon_circovirus_strain_YT3_SN_2017_complete_genome	92.901	92.601	92.301	92.101	91.301	91.201	89.901	90.001	90.001	90.101	91.701	91.501	91.101	90.101	89.801	90.501	89.501	88.501	88.701	88.601	88.601	88.701	88.601	88.801	89.501	89.501	88.901	90.401	90.501	89.501	90.701	90.701	91.101	90.601	90.201	90.401	91.101	90.401	90.401	91.301	90.701	90.801	90.801	91.401	91.401	90.801	90.501	90.301	91.701
>MW181930_1_Pigeon_circovirus_strain_TY2_SN_2016_complete_genome	92.901	92.601	92.301	92.101	91.301	91.201	89.901	90.001	90.001	90.101	91.701	91.501	91.101	90.101	89.801	90.501	89.501	88.501	88.701	88.601	88.601	88.701	88.601	88.801	89.501	89.501	88.901	90.401	90.501	89.501	90.701	90.701	91.101	90.601	90.201	90.401	91.101	90.401	90.401	91.301	90.701	90.801	90.801	91.401	91.401	90.801	90.501	90.301	91.701
>MF136688_1_Pigeon_circovirus_strain_PiCV_P12_AUS_complete_genome	92.501	92.801	93.001	92.901	92.001	92.001	91.401	91.501	91.401	90.301	92.901	92.201	92.801	91.101	92.101	91.101	91.701	93.401	95.301	95.401	95.501	95.501	95.401	95.401	91.401	90.401	89.401	90.901	91.201	90.101	92.501	92.501	92.001	92.301	91.801	90.701	91.401	91.101	91.601	91.401	91.301	91.101	91.101	91.301	91.301	91.901	91.601	91.101	93.201
>MF136685_1_UNVERIFIED_Pigeon_circovirus_strain_PiCV_P09_AUS_complete_genome	90.301	90.201	91.101	91.101	89.601	89.301	89.001	89.201	89.101	88.101	89.901	89.001	90.201	88.201	89.301	88.101	88.701	88.901	89.001	88.901	89.001	89.001	88.901	89.101	88.501	87.701	87.001	88.101	88.401	87.501	89.401	89.401	89.001	89.401	88.701	88.001	88.601	88.401	88.501	88.501	88.201	88.001	88.001	88.301	88.301	88.601	88.101	88.501	89.901
>MF136681_1_Pigeon_circovirus_strain_PiCV_P03_AUS_complete_genome	89.501	89.001	90.001	90.101	88.501	88.301	87.901	88.001	88.001	87.001	89.001	88.401	89.201	87.201	88.401	87.201	88.301	88.601	87.501	87.401	87.601	87.501	87.501	87.601	87.501	86.401	85.701	87.201	87.401	86.401	88.501	88.501	88.001	88.301	87.801	87.301	87.701	87.501	87.601	87.901	87.701	87.501	87.501	88.001	88.001	88.101	87.701	87.401	89.301
>MF136690_1_Pigeon_circovirus_strain_PiCV_P14_AUS_complete_genome	93.601	93.401	93.701	93.801	92.701	92.301	91.201	91.401	91.501	91.101	93.701	92.701	93.601	91.701	92.601	91.701	91.301	92.601	91.701	91.401	91.401	91.501	91.401	91.401	92.301	91.101	90.201	91.901	92.201	91.001	93.401	93.401	92.901	92.801	92.401	91.601	92.401	92.101	91.801	92.001	92.101	92.001	92.001	92.301	92.301	92.401	92.001	91.901	93.901
>KX108799_1_Pigeon_circovirus_strain_GF71_GuangDong_2014_complete_genome	93.901	95.101	94.901	94.701	93.901	93.601	93.201	93.501	93.501	93.101	94.701	93.401	93.901	92.901	93.201	93.301	92.501	91.401	91.901	91.801	91.901	91.801	91.701	91.901	92.601	91.801	91.001	92.401	92.701	92.201	93.801	93.801	94.001	93.601	93.301	92.201	93.001	93.101	93.201	93.301	92.601	93.401	93.401	93.101	93.101	92.801	93.501	92.701	94.201
>MG518478_1_Pigeon_circovirus_isolate_Haikou_replicationassociated_protein_REP_and_capsid_protein_CAP_genes_complete_cds	93.301	93.801	94.001	94.101	94.201	93.701	93.001	93.101	93.001	92.801	94.201	93.501	93.701	92.901	92.101	93.301	91.601	91.301	91.501	91.401	91.401	91.501	91.401	91.601	92.801	92.401	91.601	93.001	93.101	91.701	94.101	94.101	94.401	93.801	93.501	92.701	93.401	92.901	93.101	93.601	92.501	93.001	93.001	92.701	92.701	92.701	92.701	92.501	94.001
>MW041253_1_Columbid_circovirus_strain_TJ_62_complete_genome	90.301	90.701	91.801	92.001	90.101	89.601	89.601	89.601	89.601	89.301	90.901	89.601	90.401	89.501	89.801	90.201	89.101	89.201	88.601	88.801	88.701	88.801	88.701	88.901	88.601	88.701	87.801	88.701	88.901	88.301	89.901	89.901	89.901	90.501	89.401	88.801	89.501	89.001	89.501	89.201	89.101	89.301	89.301	89.001	89.001	89.301	89.501	89.701	90.901
>MW181969_1_Pigeon_circovirus_strain_BYHL1_BJ_2018_complete_genome	90.701	91.001	92.101	92.301	90.301	89.801	89.701	89.701	89.701	89.701	91.201	90.001	90.801	89.801	90.101	90.601	89.301	89.301	88.801	88.901	88.901	88.901	88.901	89.001	89.001	89.001	88.001	89.001	89.101	88.601	90.201	90.201	90.101	90.801	89.701	89.201	89.901	89.501	89.901	89.501	89.401	89.701	89.701	89.401	89.401	89.601	90.001	90.101	91.301
>MW181981_1_Pigeon_circovirus_strain_YB4_SN_2018_complete_genome	90.001	90.301	91.301	91.501	89.701	89.301	88.901	88.901	88.901	89.001	90.501	89.101	90.201	89.201	89.201	89.901	89.201	88.301	87.801	87.801	87.801	87.801	87.701	87.901	88.401	88.301	87.201	88.401	88.501	87.801	89.601	89.601	89.601	90.101	88.901	88.601	89.301	88.701	89.201	88.801	89.101	88.901	88.901	89.201	89.201	88.901	88.901	89.901	90.701
>MW181927_1_Pigeon_circovirus_strain_TF3_SN_2016_complete_genome	90.101	90.301	91.301	91.501	89.701	89.301	89.001	88.901	89.001	89.101	90.501	89.101	90.301	89.301	89.201	90.001	89.301	88.401	87.901	87.901	87.901	87.901	87.801	88.001	88.501	88.401	87.301	88.501	88.601	87.901	89.701	89.701	89.701	90.201	89.001	88.701	89.401	88.701	89.201	88.801	89.101	88.901	88.901	89.201	89.201	88.901	88.901	89.901	90.701
>DQ915957_1_Columbid_circovirus_isolate_Bel_18_complete_genome	90.101	90.401	91.401	91.501	89.901	89.401	88.901	88.801	88.901	89.201	90.601	89.501	90.301	89.401	89.401	89.801	89.301	88.901	88.301	88.301	88.201	88.301	88.201	88.401	88.901	88.701	87.601	89.001	89.201	88.401	90.201	90.201	90.001	90.701	89.201	89.801	90.601	89.001	89.101	88.801	89.201	89.401	89.401	89.001	89.001	89.101	89.401	90.301	90.801
>MW181976_1_Pigeon_circovirus_strain_HP3_SN_2018_complete_genome	89.901	90.301	91.401	91.601	89.701	89.201	89.201	89.001	89.001	88.901	90.401	89.201	90.101	88.901	89.201	89.901	88.701	88.501	88.001	88.101	88.101	88.101	88.001	88.201	88.601	88.301	87.201	88.501	88.701	87.801	89.601	89.601	89.401	90.201	89.101	88.401	89.101	88.801	89.101	88.901	89.001	89.101	89.101	89.001	89.001	88.901	89.101	90.001	90.501
>MW181932_1_Pigeon_circovirus_strain_SX1_SN_2017_complete_genome	89.701	89.901	91.101	91.301	89.301	88.801	88.901	88.701	88.701	88.501	90.301	89.001	89.801	88.801	89.101	89.401	88.501	88.101	87.801	87.901	87.901	87.901	87.801	88.001	88.301	88.301	87.201	88.201	88.401	87.701	89.401	89.401	89.201	89.901	88.901	88.301	89.001	88.601	89.001	88.501	88.801	88.901	88.901	88.601	88.601	88.901	89.001	89.901	90.401
>MW181926_1_Pigeon_circovirus_strain_TF2_SN_2016_complete_genome	89.901	90.101	91.401	91.501	89.501	89.001	89.101	88.901	89.001	88.801	90.401	89.101	90.101	88.901	89.201	90.001	88.801	88.501	88.101	88.101	88.001	88.101	88.001	88.201	88.301	88.001	86.901	88.401	88.501	87.901	89.501	89.501	89.301	90.101	89.001	89.101	89.801	88.701	89.001	88.901	89.101	89.201	89.201	89.001	89.001	89.101	89.301	90.101	90.601
>MW181986_1_Pigeon_circovirus_strain_JZ2_SN_2019_complete_genome	89.901	89.301	90.301	90.501	89.101	88.801	88.701	88.701	88.701	88.301	90.001	88.801	89.301	88.301	89.901	88.701	88.601	87.701	86.901	86.901	86.901	87.001	87.001	87.101	87.801	87.801	86.701	87.801	87.901	87.101	88.901	88.901	88.701	88.701	88.201	88.001	88.701	88.301	88.201	88.001	88.201	88.101	88.101	87.801	87.801	88.101	88.401	89.201	89.901
>MW181955_1_Pigeon_circovirus_strain_CA4_SN_2018_complete_genome	90.801	90.501	91.401	91.601	90.001	89.501	89.301	89.201	89.201	89.501	91.001	89.701	90.501	89.601	90.301	90.301	88.601	88.701	87.801	87.901	87.901	87.901	87.801	88.001	88.801	89.001	87.801	88.901	89.001	88.301	90.201	90.201	90.101	90.401	89.401	89.101	89.801	89.201	89.301	88.901	89.201	89.201	89.201	88.901	88.901	89.001	89.501	89.501	90.801
>DQ915958_1_Columbid_circovirus_isolate_Bel_20_complete_genome	90.401	90.801	91.901	92.001	90.201	89.801	89.901	89.801	89.801	89.701	91.201	89.801	90.701	89.801	90.101	90.301	89.301	89.401	88.601	88.901	88.801	88.901	88.801	88.901	89.101	88.801	87.701	89.001	89.201	88.401	90.201	90.201	90.001	90.401	89.701	89.301	90.101	89.301	89.801	89.301	89.301	89.801	89.801	89.301	89.301	89.401	89.801	89.601	91.101
>KX431143_1_Pigeon_circovirus_isolate_JS151_complete_genome	89.701	90.201	91.101	91.301	89.301	89.001	89.001	88.901	89.001	89.301	90.401	89.201	90.001	88.801	89.401	89.001	89.101	88.501	87.701	87.701	87.601	87.701	87.601	87.801	88.301	88.501	87.501	88.501	88.601	87.901	89.801	89.801	89.301	89.601	88.801	88.801	89.401	88.701	89.101	88.801	88.601	89.001	89.001	88.701	88.701	88.801	89.301	89.901	90.501
>MW181963_1_Pigeon_circovirus_strain_QD1_SN_2018_complete_genome	89.401	89.601	90.401	90.501	88.801	88.601	88.301	88.301	88.301	88.601	89.801	88.801	89.701	88.401	89.201	88.801	88.701	88.201	87.301	87.201	87.201	87.301	87.201	87.401	88.101	87.801	86.701	88.101	88.301	87.201	89.301	89.301	89.001	89.201	88.301	89.101	89.801	88.201	88.501	88.501	88.501	88.601	88.601	88.801	88.801	88.401	88.901	89.601	90.001
>MW181983_1_Pigeon_circovirus_strain_LQ1_SN_2018_complete_genome	89.801	89.801	90.701	90.801	89.101	88.901	88.501	88.501	88.501	88.401	90.001	89.001	89.501	88.801	89.001	88.701	88.901	87.801	87.301	87.101	87.101	87.201	87.101	87.301	88.001	87.701	86.601	88.101	88.301	87.601	89.301	89.301	88.901	89.101	88.401	88.301	89.001	88.601	88.901	88.601	88.701	89.001	89.001	89.301	89.301	88.301	89.101	89.301	90.001
>MW181977_1_Pigeon_circovirus_strain_HP4_SN_2018_complete_genome	89.601	90.001	90.501	90.701	88.701	88.501	88.401	88.301	88.401	88.501	90.101	89.001	89.601	88.701	89.101	88.801	88.901	87.901	87.301	87.201	87.201	87.201	87.101	87.301	88.001	87.901	86.701	88.001	88.201	87.301	89.301	89.301	89.001	88.801	89.201	89.201	89.901	88.401	88.901	88.501	88.401	88.501	88.501	88.601	88.601	88.301	88.801	89.701	90.001
>MW181952_1_Pigeon_circovirus_strain_CA1_SN_2018_complete_genome	89.601	89.901	90.601	90.701	88.701	88.401	88.301	88.201	88.301	88.801	90.101	89.101	89.801	88.901	89.101	88.901	88.801	87.901	87.301	87.201	87.201	87.201	87.101	87.301	88.101	87.901	86.801	88.101	88.201	87.401	89.301	89.301	89.101	88.901	88.401	88.501	89.201	88.501	88.901	88.701	88.601	88.601	88.601	88.801	88.801	88.401	88.901	89.701	90.101
>MW181951_1_Pigeon_circovirus_strain_KW3_SN_2018_complete_genome	89.301	90.001	90.801	91.001	89.101	88.801	88.701	88.501	88.701	89.501	90.301	89.001	90.201	89.101	89.501	88.801	88.701	88.501	87.601	87.601	87.601	87.601	87.501	87.701	88.301	88.401	87.301	88.301	88.601	87.801	89.801	89.801	89.501	89.501	88.801	88.901	89.701	88.701	89.001	88.801	88.801	88.401	88.401	88.601	88.601	88.601	89.201	89.201	89.701
>MW181950_1_Pigeon_circovirus_strain_KW2_SN_2018_complete_genome	89.301	90.001	90.801	91.001	89.101	88.801	88.701	88.501	88.701	89.501	90.301	89.001	90.201	89.101	89.501	88.801	88.701	88.501	87.601	87.601	87.601	87.601	87.501	87.701	88.301	88.401	87.301	88.301	88.601	87.801	89.801	89.801	89.501	89.501	88.801	88.901	89.701	88.701	89.001	88.801	88.801	88.401	88.401	88.601	88.601	88.601	89.201	89.201	89.701
>MW181949_1_Pigeon_circovirus_strain_KW1_SN_2018_complete_genome	89.301	89.901	90.701	91.001	89.101	88.701	88.701	88.501	88.601	89.401	90.201	89.001	90.101	89.001	89.501	88.701	88.601	88.401	87.501	87.601	87.501	87.601	87.501	87.701	88.301	88.401	87.301	88.301	88.601	87.801	89.701	89.701	89.501	89.401	88.701	88.901	89.601	88.601	89.001	88.701	88.701	88.401	88.401	88.601	88.601	88.501	89.101	89.201	89.701
>MW181968_1_Pigeon_circovirus_strain_QD6_SN_2018_complete_genome	90.301	90.301	91.201	91.301	89.501	89.201	88.801	88.901	88.901	89.201	90.901	89.501	90.301	89.401	89.801	89.501	88.801	88.801	87.901	88.001	88.001	88.101	88.001	88.201	88.801	88.501	87.301	88.801	88.901	88.201	90.001	90.001	89.601	89.601	89.101	89.101	89.801	89.001	89.301	88.901	88.801	89.301	89.301	89.201	89.201	88.901	89.401	89.501	90.801
>MW181928_1_Pigeon_circovirus_strain_TF4_SN_2016_complete_genome	90.301	90.401	91.201	91.401	89.701	89.401	88.801	89.101	89.001	89.401	90.901	89.701	90.501	89.601	90.001	89.501	88.701	88.801	88.001	88.101	88.101	88.201	88.101	88.301	88.901	88.601	87.501	88.901	89.001	88.301	90.101	90.101	89.701	89.701	89.201	89.101	89.801	89.101	89.301	88.901	88.801	89.201	89.201	89.201	89.201	89.001	89.301	89.601	90.801
>KX108796_1_Pigeon_circovirus_strain_SF78_ShangHai_2014_complete_genome	92.101	91.601	92.701	92.901	91.401	91.101	91.001	91.001	91.001	90.101	92.301	91.301	91.601	90.401	92.101	90.901	90.201	89.801	89.101	89.101	89.101	89.201	89.201	89.301	90.201	89.901	88.901	90.201	90.301	89.701	91.301	91.301	91.101	91.301	90.601	90.401	91.001	90.701	90.601	90.401	90.401	90.701	90.701	90.301	90.301	90.401	90.701	91.001	92.401
>KX108825_1_Pigeon_circovirus_strain_GH1834_GuangDong_2014_complete_genome	92.501	91.601	92.601	92.801	91.401	91.201	90.701	90.601	90.601	90.101	92.001	90.701	91.401	90.201	90.201	91.201	90.001	89.001	88.501	88.501	88.501	88.601	88.501	88.701	90.301	89.901	89.001	90.201	90.301	89.601	91.301	91.301	91.101	91.201	90.601	90.201	90.901	90.301	90.501	91.101	90.201	90.301	90.301	90.601	90.601	90.201	90.201	90.901	91.701
>KX108806_1_Pigeon_circovirus_strain_GF17_GuangDong_2014_complete_genome	92.201	91.201	92.101	92.401	91.001	90.601	90.401	90.601	90.601	89.901	92.201	90.301	91.301	90.501	90.301	90.401	89.801	89.001	88.701	88.701	88.701	88.801	88.701	88.901	90.001	89.801	88.901	90.101	90.301	89.501	91.201	91.201	91.201	90.901	90.401	90.201	90.801	90.501	90.401	90.801	90.001	90.301	90.301	90.601	90.601	90.601	90.101	90.201	91.901
>KX108805_1_Pigeon_circovirus_strain_GF82_GuangDdong_2014_complete_genome	90.501	90.901	91.901	92.201	90.501	90.201	89.901	89.901	89.901	89.401	91.301	90.201	90.701	90.101	90.301	89.801	89.301	89.101	88.801	88.901	88.901	89.001	88.901	89.101	89.101	89.101	88.201	89.301	89.501	88.701	90.401	90.401	90.301	90.201	90.101	89.401	90.101	89.601	90.401	90.001	89.801	89.701	89.701	89.701	89.701	90.101	89.901	89.601	91.301
>MW181991_1_Pigeon_circovirus_strain_QD8_SN_2019_complete_genome	89.401	89.401	90.301	90.601	89.201	88.801	88.301	88.301	88.301	87.901	89.801	88.701	89.201	88.601	88.801	88.501	88.401	87.701	87.301	87.401	87.401	87.501	87.401	87.601	87.601	87.801	86.701	87.801	88.001	87.101	88.901	88.901	88.801	88.601	88.601	87.901	88.601	88.101	88.901	88.601	88.401	88.301	88.301	88.201	88.201	88.501	88.401	89.001	90.001
>MT614188_1_Pigeon_circovirus_isolate_XJ1_complete_genome	91.301	90.601	91.101	91.401	90.501	90.201	89.601	89.701	89.601	89.501	91.301	89.701	90.401	89.601	89.901	89.801	89.301	88.601	88.301	88.301	88.401	88.401	88.301	88.501	89.401	89.401	88.301	89.401	89.501	88.701	90.501	90.501	90.501	90.201	89.701	89.401	90.101	89.401	89.501	89.301	88.701	89.601	89.601	89.301	89.301	89.301	89.501	89.301	90.501
>KX108826_1_Pigeon_circovirus_strain_JF007_JiangSu_2014_complete_genome	90.401	90.201	91.001	91.201	89.601	89.501	89.601	89.401	89.501	89.101	90.901	89.401	90.101	89.201	90.601	89.401	88.901	89.001	88.501	88.401	88.401	88.501	88.401	88.601	88.701	88.501	87.501	88.701	88.801	88.101	89.901	89.901	89.801	89.701	89.001	88.701	89.401	88.901	89.501	89.201	88.801	88.801	88.801	88.601	88.601	89.401	89.101	89.001	90.901
>KX108809_1_Pigeon_circovirus_strain_JF8_JiangSu_2014_complete_genome	92.101	92.201	92.701	92.901	91.401	91.201	91.101	91.001	90.901	90.501	92.601	91.001	91.701	90.701	92.201	91.001	90.301	90.401	90.301	90.201	90.201	90.301	90.201	90.301	90.401	90.001	89.001	90.401	90.501	89.801	91.701	91.701	91.401	91.501	90.601	90.401	91.101	90.401	91.001	91.001	90.401	90.401	90.401	90.301	90.301	90.901	90.601	90.301	92.601
>KJ704806_1_UNVERIFIED_Columbid_circovirus_isolate_SHWHAB4_complete_genome	91.601	91.001	91.701	91.801	90.801	90.201	89.901	89.801	89.801	89.801	91.901	90.701	91.501	90.501	90.101	90.701	89.701	88.801	88.301	88.401	88.301	88.401	88.301	88.501	89.601	89.701	88.701	89.601	89.901	89.001	90.701	90.701	90.801	90.301	90.101	90.801	90.801	90.301	90.301	90.401	89.801	90.401	90.401	90.001	90.001	90.201	90.201	89.801	91.301
>KJ704802_1_UNVERIFIED_Columbid_circovirus_isolate_HBLFE2_complete_genome	90.501	89.801	90.501	90.401	90.201	89.701	88.501	88.601	88.701	88.801	90.501	89.601	90.301	89.401	88.901	89.401	88.301	87.701	87.001	87.101	87.101	87.101	87.001	87.201	88.801	88.601	87.701	88.801	89.101	88.301	89.301	89.301	89.901	89.501	89.301	89.601	90.001	89.401	89.001	89.101	88.901	89.601	89.601	89.401	89.401	89.101	89.101	88.501	90.001
>MW181964_1_Pigeon_circovirus_strain_QD2_SN_2018_complete_genome	90.501	90.501	91.901	92.001	90.201	89.801	90.001	89.901	90.001	89.601	91.201	89.801	91.101	89.801	90.301	90.301	89.301	88.901	88.301	88.501	88.401	88.401	88.301	88.501	88.601	88.601	87.401	88.901	89.101	88.301	89.901	89.901	89.901	89.901	89.501	89.401	90.101	89.301	89.701	89.501	89.501	89.601	89.601	89.601	89.601	89.301	89.601	89.401	91.101
>MW181982_1_Pigeon_circovirus_strain_DA1_XJ_2018_complete_genome	90.701	91.101	91.401	91.801	89.901	89.801	90.001	90.001	90.001	90.501	91.501	90.301	90.901	90.001	89.701	89.901	89.401	88.901	88.201	88.101	88.101	88.101	88.001	88.201	89.701	89.201	88.301	89.801	89.801	89.101	90.901	90.901	90.701	90.501	90.001	90.001	90.801	90.001	90.101	89.901	89.701	89.901	89.901	90.201	90.201	89.801	90.301	89.801	90.801
>KX108817_1_Pigeon_circovirus_strain_GF16_GuangDong_2014_complete_genome	94.701	93.701	94.501	94.701	93.301	92.801	92.601	92.701	92.701	92.101	94.301	92.901	93.701	92.601	92.701	92.801	91.901	91.101	90.801	90.801	90.801	90.901	90.801	91.001	92.001	91.801	90.901	92.201	92.301	91.401	93.301	93.301	93.301	93.101	92.501	92.101	92.901	92.501	92.701	93.201	92.101	92.801	92.801	93.001	93.001	92.501	92.401	92.401	94.101
>KX108823_1_Pigeon_circovirus_strain_GF45_GuangDong_2014_complete_genome	96.301	95.401	95.801	95.701	94.601	94.101	93.501	93.401	93.401	93.601	95.801	94.301	95.001	93.601	93.901	94.101	93.201	92.201	91.901	91.901	91.901	92.001	91.901	92.101	93.401	92.901	92.001	93.501	93.701	92.901	94.801	94.801	94.501	94.301	93.501	93.501	94.201	93.701	94.101	94.701	93.401	93.701	93.701	93.701	93.701	93.701	93.801	93.601	95.901
>KX108811_1_Pigeon_circovirus_strain_GF13_GuangDong_2014_complete_genome	96.701	95.701	95.901	95.801	94.701	94.601	93.701	93.701	93.701	93.601	96.001	94.701	95.201	93.901	94.101	94.701	93.501	91.901	91.901	92.001	92.001	92.001	91.901	92.101	93.601	93.101	92.201	93.801	94.101	93.301	95.001	95.001	94.801	94.601	93.801	93.701	94.401	94.201	94.401	95.101	94.101	94.101	94.101	94.801	94.801	93.901	94.101	94.401	95.501
>KX108816_1_Pigeon_circovirus_strain_GF80_GuangDong_2014_complete_genome	92.201	92.701	93.001	93.001	91.601	91.201	90.901	90.601	90.601	90.901	92.901	92.001	92.001	91.301	91.501	91.001	90.401	90.001	90.001	89.901	89.901	89.901	89.801	90.001	91.001	90.401	89.601	91.201	91.401	90.801	92.001	92.001	92.101	91.801	91.401	91.201	91.901	91.601	91.301	91.901	91.501	91.901	91.901	91.601	91.601	91.701	91.701	91.101	93.001
>MW181959_1_Pigeon_circovirus_strain_WL4_SN_2018_complete_genome	90.501	90.801	91.001	90.901	89.901	89.501	88.901	88.501	88.501	89.001	91.201	90.301	90.801	89.501	89.601	89.501	88.901	88.601	88.501	88.401	88.401	88.401	88.301	88.501	89.601	88.701	87.801	89.601	89.801	89.101	90.201	90.201	90.401	90.001	89.601	89.901	90.501	89.601	89.701	90.301	89.801	90.101	90.101	90.301	90.301	89.801	89.801	89.901	91.501
>MW181931_1_Pigeon_circovirus_strain_TY3_SN_2016_complete_genome	90.401	90.901	90.901	90.901	90.101	89.701	89.101	88.701	88.701	89.301	91.201	90.501	90.701	89.501	89.801	89.601	88.601	88.401	88.701	88.701	88.601	88.601	88.501	88.701	89.401	88.701	87.801	89.401	89.701	88.801	90.101	90.101	90.301	89.901	89.701	89.601	90.201	89.701	89.701	90.401	89.601	90.501	90.501	90.301	90.301	90.001	89.601	89.801	91.501
>KX108793_1_Pigeon_circovirus_strain_JF9_JiangSu_2014_complete_genome	92.201	92.801	93.101	93.301	92.001	91.701	91.301	91.001	91.001	91.101	93.301	92.201	92.301	91.701	91.701	91.601	90.501	90.401	90.601	90.601	90.601	90.601	90.501	90.701	91.301	90.701	89.801	91.601	91.701	91.001	92.401	92.401	92.301	92.201	91.501	91.801	92.501	91.901	91.701	92.001	91.601	91.901	91.901	91.801	91.801	91.701	92.001	91.701	93.401
>KX108788_1_Pigeon_circovirus_strain_GH1811_GuangDong_2014_complete_genome	93.801	94.801	94.701	94.601	93.401	92.901	92.501	92.401	92.401	92.801	94.601	94.001	93.801	93.001	92.401	92.901	92.601	91.501	91.501	91.401	91.401	91.401	91.301	91.501	92.501	91.701	90.801	92.401	92.601	91.901	93.601	93.601	93.701	93.501	92.901	93.001	93.701	93.401	93.301	94.101	93.401	93.701	93.701	93.501	93.501	93.201	93.701	93.201	94.601
>KX108783_1_Pigeon_circovirus_strain_GF67_GuangDong_2014_complete_genome	93.001	93.901	93.701	93.701	92.601	92.101	91.701	91.601	91.601	91.901	93.701	93.001	92.901	92.201	91.801	91.901	91.401	90.601	90.601	90.501	90.401	90.501	90.401	90.601	91.901	91.101	90.301	91.901	92.101	91.601	93.001	93.001	92.901	92.901	92.301	92.001	92.601	92.501	92.101	92.801	92.301	92.701	92.701	92.401	92.401	92.201	92.601	92.301	93.501
>KX108787_1_Pigeon_circovirus_strain_GF69_GuangDong_2014_complete_genome	93.401	94.401	94.401	94.401	93.401	92.901	92.601	92.401	92.401	92.701	94.601	94.101	93.901	92.901	92.701	92.601	92.101	91.601	91.601	91.501	91.501	91.501	91.401	91.601	92.601	91.701	90.801	92.401	92.701	92.001	93.301	93.301	93.601	93.401	92.901	93.001	93.701	93.001	93.401	94.101	93.201	93.301	93.301	93.601	93.601	93.401	93.501	93.501	94.701
>KX108785_1_Pigeon_circovirus_strain_GF68_GuangDong_2014_complete_genome	93.201	94.001	93.901	93.901	93.001	92.501	92.201	92.001	92.001	92.401	94.101	93.601	93.501	92.401	92.401	92.401	91.701	91.401	91.401	91.201	91.301	91.301	91.201	91.401	92.001	91.301	90.401	91.901	92.201	91.601	92.701	92.701	93.201	92.901	92.401	92.201	93.001	92.801	92.701	93.501	92.601	92.701	92.701	92.901	92.901	92.701	92.601	92.801	94.201
>KX108780_1_Pigeon_circovirus_strain_GF42_GuangDong_2014_complete_genome	94.601	94.701	94.901	94.901	93.801	93.301	92.801	92.801	92.701	93.101	95.001	94.101	94.201	93.101	92.901	93.101	92.401	91.101	91.001	91.001	91.001	91.001	90.901	91.101	93.001	92.501	91.601	93.201	93.301	92.601	94.301	94.301	94.001	94.001	93.301	93.101	93.801	93.201	93.001	93.801	93.101	93.501	93.501	93.501	93.501	93.101	93.501	93.401	94.601
>KX108807_1_Pigeon_circovirus_strain_GF53_GuangDong_2014_complete_genome	94.601	94.401	95.201	95.201	94.401	94.101	93.501	93.601	93.601	93.101	94.701	93.601	94.101	92.901	92.501	93.301	91.901	91.701	91.001	90.901	91.001	91.001	90.901	91.101	92.601	92.201	91.401	92.901	93.001	92.201	94.001	94.001	93.801	93.601	92.801	92.701	93.401	92.901	92.801	93.401	92.501	92.801	92.801	92.701	92.701	92.401	92.701	92.401	94.501
>KX108812_1_Pigeon_circovirus_strain_GF43_GuangDong_2014_complete_genome	93.501	92.501	92.801	92.801	91.801	91.401	90.801	90.801	90.801	90.701	92.401	91.501	92.101	90.601	90.701	91.001	90.301	89.701	89.201	89.101	89.201	89.201	89.101	89.301	90.201	89.901	89.301	90.501	90.601	90.001	91.601	91.601	91.401	91.201	90.501	90.501	91.101	90.701	90.901	91.701	90.501	90.901	90.901	91.301	91.301	91.001	90.701	90.201	92.701
>MW181948_1_Pigeon_circovirus_strain_WQ6_SN_2018_complete_genome	91.701	90.701	91.201	91.201	90.201	89.801	89.001	89.101	89.101	89.001	90.801	89.901	90.401	88.901	89.501	89.401	88.601	88.301	87.601	87.601	87.601	87.701	87.601	87.801	88.501	88.301	87.401	88.601	88.701	88.301	89.901	89.901	89.601	89.401	88.801	89.101	89.601	89.401	89.801	90.701	89.201	89.401	89.401	90.101	90.101	89.701	89.601	89.501	91.301
>MW181940_1_Pigeon_circovirus_strain_LT3_SN_2018_complete_genome	91.401	90.401	90.901	90.901	90.001	89.601	88.901	88.901	89.001	88.801	90.501	89.701	90.001	88.901	89.201	89.101	88.401	88.101	87.501	87.301	87.401	87.401	87.301	87.501	88.301	88.101	87.201	88.401	88.501	88.101	89.701	89.701	89.501	89.201	88.701	88.901	89.401	89.101	89.501	90.501	89.001	89.201	89.201	89.901	89.901	89.401	89.401	89.201	91.001
>MW181939_1_Pigeon_circovirus_strain_LT2_SN_2018_complete_genome	91.401	90.401	90.901	90.901	90.001	89.601	88.901	88.901	89.001	88.801	90.501	89.701	90.001	88.901	89.201	89.101	88.401	88.101	87.501	87.301	87.401	87.401	87.301	87.501	88.301	88.101	87.201	88.401	88.501	88.101	89.701	89.701	89.501	89.201	88.701	88.901	89.401	89.101	89.501	90.501	89.001	89.201	89.201	89.901	89.901	89.401	89.401	89.201	91.001
>KX108827_1_Pigeon_circovirus_strain_SF079_ShangHai_2014_complete_genome	88.101	88.901	90.101	90.201	88.401	88.101	87.801	88.001	88.001	87.401	88.801	88.001	88.901	87.601	87.601	88.201	87.001	87.101	86.801	86.801	86.801	86.901	86.801	87.001	87.201	86.401	85.501	87.101	87.301	86.101	87.901	87.901	88.101	88.401	87.401	87.401	87.901	87.701	87.801	87.801	87.301	87.501	87.501	88.101	88.101	87.901	87.801	87.901	89.101
>DQ090945_2_Columbid_circovirus_isolate_zj1_complete_genome	89.101	89.601	90.201	90.301	88.801	88.601	87.901	88.001	88.101	88.001	89.601	88.801	89.201	88.001	88.501	88.101	88.201	88.001	87.001	86.901	86.901	87.001	86.901	87.101	87.701	87.701	86.701	87.901	88.001	86.901	88.901	88.901	88.801	88.201	88.101	88.001	88.501	88.301	88.601	88.601	88.201	88.601	88.601	88.801	88.801	88.501	88.701	88.401	90.001
>KJ704803_1_UNVERIFIED_Columbid_circovirus_isolate_JSNJ_complete_genome	87.901	88.401	89.201	89.301	87.801	87.601	86.701	86.801	86.901	87.001	88.601	87.701	88.601	87.301	87.401	87.301	87.001	86.901	85.801	85.701	85.701	85.801	85.701	85.901	86.801	87.101	86.301	87.101	87.201	86.201	88.001	88.001	87.801	87.101	87.101	87.901	87.601	87.301	87.501	87.501	87.201	87.401	87.401	87.601	87.601	87.401	87.501	87.301	88.901
>MW181944_1_Pigeon_circovirus_strain_WQ2_SN_2018_complete_genome	88.301	89.201	89.401	89.501	88.601	88.101	87.501	87.601	87.601	87.601	89.101	88.401	88.601	87.801	88.001	87.701	88.201	87.701	86.801	86.601	86.701	86.701	86.601	86.801	87.301	86.701	85.701	87.401	87.501	86.501	88.501	88.501	88.101	87.801	87.601	88.401	89.001	87.901	88.001	88.001	87.901	88.101	88.101	88.001	88.001	87.901	88.101	88.201	89.601
>MW181958_1_Pigeon_circovirus_strain_WL3_SN_2018_complete_genome	88.901	89.401	89.901	89.801	88.801	88.401	88.101	87.901	88.001	88.401	89.401	88.601	89.001	88.401	88.401	87.901	87.701	88.301	87.601	87.601	87.601	87.701	87.601	87.801	87.101	86.501	85.701	87.301	87.401	86.801	88.501	88.501	88.301	87.901	87.701	87.601	88.301	88.301	88.701	88.301	88.401	88.501	88.501	88.401	88.401	88.201	88.701	88.001	89.801
>MW181957_1_Pigeon_circovirus_strain_WL2_SN_2018_complete_genome	88.901	89.401	89.901	89.801	88.801	88.401	88.101	87.901	88.001	88.401	89.401	88.601	89.001	88.401	88.401	87.901	87.701	88.301	87.601	87.601	87.601	87.701	87.601	87.801	87.101	86.501	85.701	87.301	87.401	86.801	88.501	88.501	88.301	87.901	87.701	87.601	88.301	88.301	88.701	88.301	88.401	88.501	88.501	88.401	88.401	88.201	88.701	88.001	89.801
>MW181956_1_Pigeon_circovirus_strain_WL1_SN_2018_complete_genome	88.901	89.401	89.801	89.801	88.701	88.401	88.101	87.901	87.901	88.501	89.301	88.601	89.001	88.401	88.401	87.901	87.601	88.301	87.501	87.501	87.601	87.601	87.501	87.701	87.101	86.501	85.601	87.301	87.401	86.701	88.401	88.401	88.201	87.801	87.601	87.601	88.301	88.301	88.601	88.301	88.401	88.401	88.401	88.301	88.301	88.201	88.601	87.901	89.701
>MW181953_1_Pigeon_circovirus_strain_CA2_SN_2018_complete_genome	88.601	89.101	89.501	89.501	88.301	88.001	87.701	87.601	87.601	87.901	89.001	88.301	88.801	88.201	88.201	87.901	87.501	87.701	86.801	86.901	86.901	87.001	86.901	87.101	86.901	86.201	85.401	87.201	87.201	86.501	88.201	88.201	87.901	87.701	87.101	87.401	88.001	88.101	88.501	88.001	88.001	87.901	87.901	88.001	88.001	88.101	88.301	88.101	89.401
>MW181942_1_Pigeon_circovirus_strain_LT5_SN_2018_complete_genome	88.801	89.301	89.701	89.601	88.401	88.101	87.701	87.501	87.501	88.101	89.001	88.301	88.801	88.101	88.201	87.801	87.801	87.901	87.101	87.201	87.201	87.301	87.201	87.401	86.901	86.601	85.701	87.201	87.201	86.501	88.401	88.401	88.101	87.701	87.301	87.601	88.101	88.201	88.601	88.101	87.601	88.101	88.101	88.201	88.201	88.001	88.301	87.801	89.601
>MW181941_1_Pigeon_circovirus_strain_LT4_SN_2018_complete_genome	88.701	89.201	89.701	89.501	88.401	88.001	87.601	87.401	87.501	88.001	89.001	88.201	88.801	88.101	88.101	87.701	87.801	87.901	87.001	87.101	87.201	87.201	87.101	87.301	86.901	86.501	85.701	87.201	87.201	86.501	88.301	88.301	88.001	87.601	87.301	87.501	88.101	88.101	88.601	88.001	87.601	88.001	88.001	88.201	88.201	87.901	88.301	87.801	89.601
>MW181943_1_Pigeon_circovirus_strain_WQ1_SN_2018_complete_genome	88.801	89.201	89.501	89.401	88.401	88.101	87.701	87.501	87.601	87.801	89.101	88.201	88.801	88.201	88.301	87.601	88.001	88.101	87.301	87.401	87.401	87.501	87.401	87.601	87.001	86.401	85.601	87.501	87.601	86.701	88.301	88.301	88.001	87.601	87.301	87.601	88.101	88.001	88.701	88.001	87.901	88.001	88.001	88.001	88.001	87.801	88.301	87.801	89.601
>MW181937_1_Pigeon_circovirus_strain_YT5_SN_2017_complete_genome	89.301	90.001	90.601	90.601	89.401	89.101	88.501	88.501	88.501	88.701	89.801	88.901	89.601	88.201	88.501	88.201	87.701	88.301	87.501	87.401	87.501	87.501	87.401	87.601	87.601	87.001	86.101	87.601	87.701	87.201	88.801	88.801	88.601	88.301	88.101	88.001	88.601	88.701	88.801	89.201	89.001	89.101	89.101	89.501	89.501	88.601	88.901	88.401	90.401
>MW181936_1_Pigeon_circovirus_strain_YT4_SN_2017_complete_genome	89.301	90.001	90.601	90.501	89.301	89.101	88.401	88.401	88.501	88.601	89.801	88.801	89.501	88.101	88.501	88.201	87.701	88.201	87.501	87.401	87.401	87.501	87.401	87.601	87.601	86.901	86.101	87.601	87.701	87.101	88.701	88.701	88.601	88.301	88.101	88.001	88.601	88.701	88.701	89.101	88.901	89.001	89.001	89.501	89.501	88.501	88.901	88.401	90.301
>MW181933_1_Pigeon_circovirus_strain_YT1_SN_2017_complete_genome	89.301	90.001	90.601	90.501	89.301	89.101	88.401	88.401	88.501	88.601	89.801	88.801	89.501	88.101	88.501	88.201	87.701	88.201	87.501	87.401	87.401	87.501	87.401	87.601	87.601	86.901	86.101	87.601	87.701	87.101	88.701	88.701	88.601	88.301	88.101	88.001	88.601	88.701	88.701	89.101	88.901	89.001	89.001	89.501	89.501	88.501	88.901	88.401	90.301
>MF576431_1_Pigeon_circovirus_strain_PCV_11D2017_complete_genome	89.001	89.101	90.101	90.101	88.701	88.301	87.601	87.501	87.601	87.501	89.301	88.101	89.101	87.901	88.001	88.601	87.601	87.301	86.601	86.601	86.601	86.701	86.601	86.801	87.101	87.001	86.101	87.501	87.501	86.901	88.301	88.301	88.201	87.801	87.701	87.901	88.401	87.901	88.201	88.201	88.301	88.001	88.001	88.301	88.301	88.101	87.801	87.601	89.801
>MW181987_1_Pigeon_circovirus_strain_JZ3_SN_2019_complete_genome	89.001	89.101	90.001	89.901	88.801	88.501	87.601	87.401	87.501	87.601	89.401	88.101	89.101	87.801	88.101	87.801	87.601	87.101	86.401	86.401	86.401	86.501	86.401	86.601	87.201	86.901	86.101	87.501	87.601	86.901	88.401	88.401	88.201	87.701	87.701	87.801	88.301	88.001	88.401	88.401	88.601	88.201	88.201	88.701	88.701	88.101	88.001	88.001	90.101
>MW181984_1_Pigeon_circovirus_strain_LQ2_SN_2018_complete_genome	89.101	89.101	90.201	90.201	88.901	88.601	87.801	87.801	87.801	87.401	89.501	88.301	89.101	88.001	88.101	88.001	87.801	87.301	86.601	86.601	86.601	86.701	86.601	86.801	87.201	86.901	86.101	87.601	87.701	87.001	88.501	88.501	88.301	88.101	87.801	87.901	88.401	88.101	88.401	88.401	88.401	88.301	88.301	88.501	88.501	88.201	88.101	88.001	90.201
>MW181974_1_Pigeon_circovirus_strain_HP1_SN_2018_complete_genome	88.401	88.501	89.201	89.301	87.601	87.501	87.401	87.301	87.301	86.901	88.701	87.501	88.701	87.401	89.501	87.601	87.401	87.401	86.701	86.601	86.701	86.701	86.701	86.801	86.401	86.201	85.301	86.501	86.601	85.901	87.801	87.801	87.201	87.301	86.601	87.101	87.501	87.201	88.101	87.601	87.601	87.301	87.301	87.501	87.501	87.601	87.501	87.301	89.301
>MW181989_1_Pigeon_circovirus_strain_LH3_HE_2019_complete_genome	88.701	89.101	89.701	89.701	88.601	88.401	87.901	87.901	88.001	87.801	89.201	88.201	89.001	87.801	89.801	88.001	87.801	87.901	87.201	87.101	87.201	87.201	87.201	87.301	86.901	86.401	85.501	87.001	87.101	86.301	88.301	88.301	87.901	87.901	87.101	87.501	88.101	87.901	88.401	88.101	88.001	88.001	88.001	88.101	88.101	88.101	87.901	87.801	89.901
>MN920392_1_Pigeon_circovirus_isolate_nmszw6_complete_genome	88.001	89.801	90.401	90.401	88.901	88.601	88.701	88.701	88.701	88.201	89.301	88.701	89.501	88.401	89.201	88.001	88.101	88.401	88.201	88.101	88.101	88.201	88.101	88.201	87.301	86.801	86.001	87.601	87.701	87.101	88.701	88.701	88.401	88.601	87.901	88.001	88.701	88.201	88.401	88.301	88.301	87.701	87.701	88.401	88.401	88.401	88.801	87.901	89.101
>KF738858_1_Columbid_circovirus_isolate_PL44B_complete_genome	88.401	89.201	89.901	89.901	88.601	88.401	87.701	87.701	87.601	87.901	88.901	88.301	88.901	88.101	88.301	87.901	88.001	87.601	87.001	87.001	87.101	87.101	87.001	87.201	86.701	86.401	85.601	87.301	87.401	86.701	88.101	88.101	88.001	88.001	87.601	87.501	88.201	87.901	88.401	88.101	88.301	88.001	88.001	88.401	88.401	88.001	88.501	88.401	89.501
>KF738849_1_Columbid_circovirus_isolate_PL172_complete_genome	88.301	89.001	89.801	89.901	88.201	87.901	88.201	88.201	88.201	87.601	88.601	87.801	88.801	87.901	88.101	87.801	87.701	87.801	87.101	87.001	87.101	87.101	87.001	87.201	86.701	86.401	85.401	87.001	87.101	86.601	87.901	87.901	87.801	87.801	87.301	87.501	88.001	87.601	88.201	87.701	87.601	88.201	88.201	88.001	88.001	87.801	88.201	87.601	88.801
>MW181938_1_Pigeon_circovirus_strain_LT1_SN_2018_complete_genome	89.801	90.301	91.001	91.001	89.501	89.201	88.801	88.801	88.801	88.701	90.101	89.201	89.901	88.701	88.801	88.701	88.001	88.301	87.801	87.701	87.701	87.801	87.701	87.901	87.901	87.401	86.601	88.301	88.401	87.601	89.001	89.001	89.001	88.801	88.701	88.501	89.101	88.901	89.101	89.501	89.001	89.301	89.301	89.501	89.501	89.001	89.101	88.701	90.901
>DQ090944_2_Columbid_circovirus_isolate_zj2_complete_genome	89.501	89.801	91.001	90.901	89.501	89.601	90.001	89.901	89.801	88.301	89.801	89.201	89.901	88.501	88.401	89.101	89.601	88.201	88.101	88.001	88.001	88.101	88.001	88.201	87.901	87.501	86.701	88.301	88.401	87.301	89.201	89.201	88.901	89.101	88.801	88.401	89.001	88.501	89.101	89.201	88.701	88.601	88.601	89.101	89.101	88.601	88.601	88.701	89.901
>MF664482_1_Columbid_circovirus_strain_SLMA4_2016_complete_genome	89.901	90.601	91.101	91.101	89.801	89.201	89.001	88.901	89.001	88.801	90.601	89.801	90.601	89.201	88.801	89.501	88.701	88.501	87.701	87.601	87.701	87.701	87.601	87.801	89.301	89.101	88.201	89.601	89.701	88.301	90.701	90.701	90.501	90.101	89.001	89.701	90.301	90.001	89.001	89.501	88.701	89.801	89.801	89.901	89.901	89.701	89.701	89.601	90.801
>MW656169_1_Pigeon_circovirus_isolate_TSPSwab16_3_complete_genome	88.901	89.701	90.701	90.801	89.501	88.901	89.001	89.001	89.001	88.501	90.101	89.301	90.001	88.801	89.101	88.401	88.801	89.101	88.701	88.601	88.601	88.701	88.601	88.801	88.401	87.901	87.001	88.601	88.701	87.701	89.601	89.601	89.401	88.901	88.701	88.501	89.201	89.101	89.001	89.301	88.801	89.201	89.201	89.101	89.101	89.401	89.301	88.501	90.701
>MW656168_1_Pigeon_circovirus_isolate_TSPSwab15_4_complete_genome	88.501	89.801	90.301	90.401	89.101	88.401	88.701	88.701	88.701	88.301	89.801	89.201	89.801	88.701	89.201	88.301	89.001	89.101	88.801	88.701	88.701	88.801	88.701	88.901	88.001	87.501	86.601	88.201	88.301	87.301	89.301	89.301	88.901	88.801	88.301	88.101	88.801	88.701	88.901	88.701	88.501	88.901	88.901	88.701	88.701	89.101	89.201	88.401	90.201
>MW656167_1_Pigeon_circovirus_isolate_TSPSwab7_4_complete_genome	88.501	89.701	90.301	90.301	89.001	88.401	88.601	88.601	88.701	88.301	89.701	89.101	89.701	88.701	89.101	88.301	88.901	89.101	88.701	88.601	88.701	88.701	88.601	88.801	88.001	87.401	86.501	88.201	88.301	87.301	89.201	89.201	88.901	88.701	88.201	88.101	88.701	88.701	88.901	88.701	88.501	88.901	88.901	88.701	88.701	89.101	89.201	88.301	90.201
>MW656163_1_Pigeon_circovirus_isolate_TSP_swab7_complete_genome	88.601	89.801	90.301	90.401	89.101	88.401	88.701	88.701	88.701	88.301	89.801	89.201	89.801	88.701	89.201	88.301	89.001	89.101	88.801	88.701	88.701	88.801	88.701	88.901	88.001	87.501	86.601	88.201	88.301	87.401	89.301	89.301	88.901	88.801	88.301	88.101	88.801	88.701	88.901	88.701	88.501	89.001	89.001	88.701	88.701	89.101	89.301	88.301	90.201
>MW656151_1_Pigeon_circovirus_isolate_TSPSwab15_3_complete_genome	88.601	89.801	90.301	90.401	89.101	88.401	88.701	88.701	88.701	88.301	89.801	89.201	89.801	88.701	89.201	88.301	89.001	89.101	88.801	88.701	88.701	88.801	88.701	88.901	88.001	87.501	86.601	88.201	88.301	87.401	89.301	89.301	88.901	88.801	88.301	88.101	88.801	88.701	88.901	88.701	88.501	89.001	89.001	88.701	88.701	89.101	89.301	88.301	90.201
>MW656146_1_Pigeon_circovirus_isolate_TSP_swab16_complete_genome	88.601	89.801	90.301	90.401	89.101	88.401	88.701	88.701	88.701	88.301	89.801	89.201	89.801	88.701	89.201	88.301	89.001	89.101	88.801	88.701	88.701	88.801	88.701	88.901	88.001	87.501	86.601	88.201	88.301	87.401	89.301	89.301	88.901	88.801	88.301	88.101	88.801	88.701	88.901	88.701	88.501	89.001	89.001	88.701	88.701	89.101	89.301	88.301	90.201
>MW656149_1_Pigeon_circovirus_isolate_TSPSwab15_1_complete_genome	88.501	89.701	90.301	90.301	89.001	88.401	88.601	88.601	88.701	88.301	89.701	89.101	89.701	88.701	89.101	88.301	88.901	89.101	88.701	88.601	88.701	88.701	88.601	88.801	88.001	87.401	86.501	88.201	88.301	87.301	89.201	89.201	88.901	88.701	88.201	88.101	88.701	88.701	88.901	88.701	88.501	88.901	88.901	88.701	88.701	89.101	89.201	88.301	90.201
>MW656145_1_Pigeon_circovirus_isolate_TSP_swab15_complete_genome	88.501	89.701	90.201	90.301	89.101	88.401	88.601	88.601	88.601	88.201	89.701	89.101	89.701	88.701	89.101	88.201	89.001	89.001	88.701	88.601	88.601	88.701	88.601	88.801	88.001	87.501	86.601	88.201	88.301	87.401	89.301	89.301	88.901	88.801	88.201	88.101	88.801	88.701	88.801	88.601	88.401	89.001	89.001	88.601	88.601	89.001	89.301	88.301	90.101
>MW656150_1_Pigeon_circovirus_isolate_TSPSwab15_2_complete_genome	88.501	89.701	90.301	90.301	89.101	88.501	88.601	88.601	88.701	88.301	89.701	89.101	89.701	88.801	89.101	88.301	89.001	89.101	88.701	88.601	88.701	88.701	88.601	88.801	88.101	87.501	86.601	88.301	88.401	87.401	89.301	89.301	89.001	88.801	88.201	88.201	88.801	88.801	88.901	88.701	88.501	88.901	88.901	88.601	88.601	89.001	89.301	88.401	90.201
>MW656148_1_Pigeon_circovirus_isolate_TSPSwab7_2_complete_genome	88.501	89.901	90.401	90.501	89.201	88.501	88.801	88.801	88.801	88.401	89.901	89.301	89.901	88.801	89.301	88.401	88.901	89.201	88.901	88.801	88.801	88.901	88.801	89.001	88.101	87.501	86.501	88.301	88.401	87.401	89.401	89.401	89.001	88.901	88.401	88.201	88.901	88.801	89.001	88.801	88.601	89.001	89.001	88.801	88.801	89.201	89.301	88.501	90.201
>MW656147_1_Pigeon_circovirus_isolate_TSPSwab7_1_complete_genome	88.601	89.901	90.401	90.501	89.201	88.501	88.801	88.801	88.801	88.401	89.901	89.201	89.901	88.801	89.301	88.401	89.101	89.201	88.801	88.701	88.801	88.801	88.701	88.901	88.101	87.601	86.701	88.301	88.401	87.401	89.401	89.401	89.001	88.901	88.401	88.201	88.901	88.801	89.001	88.801	88.601	89.001	89.001	88.801	88.801	89.201	89.301	88.401	90.301
>MW656140_1_Pigeon_circovirus_isolate_TSP7_4_complete_genome	88.601	89.801	90.401	90.401	89.101	88.501	88.701	88.701	88.801	88.401	89.801	89.201	89.801	88.801	89.201	88.401	89.001	89.201	88.801	88.701	88.701	88.801	88.701	88.901	88.101	87.501	86.601	88.301	88.401	87.401	89.301	89.301	89.001	88.801	88.301	88.201	88.801	88.801	89.001	88.801	88.601	89.001	89.001	88.801	88.801	89.201	89.301	88.401	90.301
>MW656143_1_Pigeon_circovirus_isolate_TSP7_10_complete_genome	88.501	89.701	90.301	90.301	89.001	88.401	88.601	88.601	88.701	88.301	89.701	89.101	89.701	88.701	89.101	88.301	89.001	89.101	88.701	88.601	88.601	88.701	88.601	88.801	88.001	87.401	86.501	88.401	88.501	87.501	89.201	89.201	89.001	88.701	88.301	88.201	88.801	88.901	88.901	88.701	88.601	88.901	88.901	88.801	88.801	89.201	89.301	88.401	90.201
>MW656135_1_Pigeon_circovirus_isolate_TSP5_9_complete_genome	88.501	89.701	90.201	90.301	89.001	88.301	88.601	88.601	88.601	88.201	89.701	89.101	89.701	88.601	89.101	88.201	89.001	89.001	88.601	88.501	88.601	88.601	88.501	88.701	88.001	87.401	86.501	88.301	88.501	87.501	89.201	89.201	89.001	88.701	88.401	88.101	88.801	88.901	88.801	88.601	88.601	88.901	88.901	88.701	88.701	89.101	89.301	88.301	90.101
>MW656130_1_Pigeon_circovirus_isolate_TSP5_3_complete_genome	88.501	89.701	90.201	90.301	89.001	88.301	88.601	88.601	88.601	88.201	89.701	89.101	89.701	88.601	89.101	88.201	89.001	89.001	88.601	88.501	88.601	88.601	88.501	88.701	88.001	87.401	86.501	88.301	88.501	87.501	89.201	89.201	89.001	88.701	88.401	88.101	88.801	88.901	88.801	88.601	88.601	88.901	88.901	88.701	88.701	89.101	89.301	88.301	90.101
>MW656141_1_Pigeon_circovirus_isolate_TSP7_7_complete_genome	88.401	89.601	90.201	90.201	88.901	88.301	88.501	88.501	88.601	88.201	89.601	89.001	89.601	88.601	89.001	88.201	89.001	89.101	88.701	88.601	88.601	88.701	88.601	88.801	87.901	87.301	86.401	88.301	88.501	87.401	89.101	89.101	89.001	88.601	88.301	88.201	88.801	88.901	88.801	88.601	88.601	88.801	88.801	88.701	88.701	89.101	89.301	88.401	90.101
>MW656138_1_Pigeon_circovirus_isolate_TSP7_1_complete_genome	88.501	89.701	90.201	90.301	89.001	88.301	88.601	88.601	88.601	88.201	89.701	89.101	89.701	88.601	89.101	88.201	89.101	89.101	88.701	88.601	88.701	88.701	88.601	88.801	88.001	87.401	86.501	88.301	88.401	87.501	89.201	89.201	88.901	88.701	88.301	88.201	88.901	88.801	88.801	88.601	88.501	88.901	88.901	88.701	88.701	89.101	89.401	88.401	90.101
>MW656133_1_Pigeon_circovirus_isolate_TSP5_6_complete_genome	88.401	89.601	90.101	90.201	88.901	88.201	88.501	88.501	88.501	88.101	89.601	89.001	89.601	88.501	89.001	88.101	88.901	88.901	88.501	88.401	88.501	88.501	88.401	88.601	87.901	87.301	86.401	88.201	88.301	87.301	89.101	89.101	88.801	88.601	88.201	88.001	88.701	88.701	88.701	88.501	88.401	88.801	88.801	88.601	88.601	89.001	89.201	88.201	90.001
>MW656137_1_Pigeon_circovirus_isolate_TSP6_5_complete_genome	88.601	89.801	90.301	90.401	89.101	88.401	88.701	88.701	88.701	88.301	89.801	89.201	89.801	88.701	89.201	88.301	89.001	89.101	88.701	88.601	88.701	88.701	88.601	88.801	88.101	87.501	86.601	88.301	88.401	87.501	89.301	89.301	89.001	88.801	88.301	88.101	88.801	88.801	88.901	88.701	88.501	89.001	89.001	88.801	88.801	89.201	89.301	88.401	90.201
>MW656132_1_Pigeon_circovirus_isolate_TSP5_5_complete_genome	88.601	89.801	90.301	90.401	89.101	88.401	88.701	88.701	88.701	88.301	89.801	89.201	89.801	88.701	89.201	88.301	89.001	89.101	88.701	88.601	88.701	88.701	88.601	88.801	88.101	87.501	86.601	88.301	88.401	87.501	89.301	89.301	89.001	88.801	88.301	88.101	88.801	88.801	88.901	88.701	88.501	89.001	89.001	88.801	88.801	89.201	89.301	88.401	90.201
>MW656129_1_Pigeon_circovirus_isolate_TSP5_2_complete_genome	88.601	89.801	90.301	90.401	89.101	88.401	88.701	88.701	88.701	88.301	89.801	89.201	89.801	88.701	89.201	88.301	89.001	89.101	88.701	88.601	88.701	88.701	88.601	88.801	88.101	87.501	86.601	88.301	88.401	87.501	89.301	89.301	89.001	88.801	88.301	88.101	88.801	88.801	88.901	88.701	88.501	89.001	89.001	88.801	88.801	89.201	89.301	88.401	90.201
>MW656139_1_Pigeon_circovirus_isolate_TSP7_3_complete_genome	88.501	89.701	90.301	90.301	89.001	88.401	88.601	88.601	88.701	88.301	89.701	89.101	89.701	88.701	89.101	88.301	89.001	89.201	88.801	88.701	88.701	88.801	88.701	88.901	88.001	87.401	86.501	88.301	88.401	87.401	89.201	89.201	89.001	88.701	88.201	88.201	88.801	88.801	88.901	88.701	88.501	88.901	88.901	88.801	88.801	89.201	89.301	88.501	90.201
>MW656126_1_Pigeon_circovirus_isolate_TSP5_8_complete_genome	88.501	89.701	90.301	90.301	89.001	88.401	88.601	88.601	88.701	88.301	89.701	89.101	89.701	88.701	89.101	88.301	89.001	89.101	88.701	88.601	88.701	88.701	88.601	88.801	88.001	87.401	86.501	88.301	88.401	87.401	89.201	89.201	89.001	88.701	88.201	88.201	88.801	88.701	88.901	88.701	88.701	88.901	88.901	88.801	88.801	89.101	89.301	88.601	90.101
>MW656142_1_Pigeon_circovirus_isolate_TSP7_9_complete_genome	88.501	89.701	90.301	90.301	89.001	88.401	88.601	88.601	88.701	88.301	89.701	89.101	89.701	88.701	89.101	88.301	88.901	89.101	88.701	88.601	88.601	88.701	88.601	88.801	88.001	87.401	86.501	88.301	88.501	87.401	89.201	89.201	89.101	88.701	88.301	88.101	88.701	88.901	88.901	88.701	88.601	88.901	88.901	88.801	88.801	89.201	89.201	88.401	90.201
>MW656136_1_Pigeon_circovirus_isolate_TSP5_10_complete_genome	88.501	89.701	90.301	90.301	89.001	88.401	88.601	88.601	88.701	88.301	89.701	89.101	89.701	88.701	89.101	88.301	88.901	89.101	88.701	88.601	88.601	88.701	88.601	88.801	88.001	87.401	86.501	88.301	88.501	87.401	89.201	89.201	89.101	88.701	88.301	88.101	88.701	88.901	88.901	88.701	88.601	88.901	88.901	88.801	88.801	89.201	89.201	88.401	90.201
>MW656128_1_Pigeon_circovirus_isolate_TSP5_1_complete_genome	88.501	89.701	90.201	90.301	89.001	88.301	88.601	88.601	88.601	88.201	89.701	89.101	89.701	88.601	89.101	88.201	88.901	89.001	88.601	88.501	88.601	88.601	88.501	88.701	88.001	87.401	86.501	88.201	88.401	87.401	89.201	89.201	89.001	88.701	88.301	88.001	88.701	88.801	88.801	88.601	88.501	88.901	88.901	88.701	88.701	89.101	89.201	88.301	90.101
>MW656134_1_Pigeon_circovirus_isolate_TSP5_7_complete_genome	88.501	89.701	90.201	90.301	89.001	88.301	88.601	88.601	88.601	88.201	89.701	89.101	89.701	88.601	89.101	88.201	88.901	89.001	88.601	88.501	88.601	88.601	88.501	88.701	87.901	87.401	86.501	88.201	88.401	87.301	89.201	89.201	88.901	88.701	88.301	88.101	88.701	88.801	88.801	88.601	88.601	88.901	88.901	88.601	88.601	89.001	89.201	88.201	90.101
>MW656131_1_Pigeon_circovirus_isolate_TSP5_4_complete_genome	88.401	89.601	90.201	90.201	88.901	88.301	88.501	88.501	88.601	88.301	89.601	89.001	89.601	88.601	89.001	88.201	88.801	89.001	88.601	88.501	88.501	88.601	88.501	88.701	87.901	87.301	86.401	88.201	88.301	87.301	89.101	89.101	88.901	88.701	88.101	88.001	88.601	88.801	88.801	88.601	88.401	88.901	88.901	88.701	88.701	89.101	89.101	88.401	90.101
>MW656144_1_Pigeon_circovirus_isolate_TSP15_3_complete_genome	88.701	89.901	90.801	90.801	89.601	89.001	88.901	88.801	88.901	88.701	90.101	89.201	90.201	89.101	89.201	88.301	88.801	89.301	88.801	88.701	88.701	88.801	88.701	88.901	88.401	88.001	87.101	88.701	88.801	87.601	89.801	89.801	89.101	89.101	88.701	88.701	89.401	89.101	89.101	89.101	88.901	89.301	89.301	89.301	89.301	89.301	89.201	89.201	90.701
>KF738855_1_Columbid_circovirus_isolate_PL40_complete_genome	90.201	90.401	91.101	91.301	90.001	89.601	89.001	89.001	89.001	88.801	90.401	90.201	90.201	89.801	88.701	89.401	88.701	87.601	87.301	87.301	87.301	87.401	87.301	87.501	89.101	89.001	88.101	89.801	89.801	88.501	90.501	90.501	90.001	89.601	88.701	89.801	90.401	89.701	89.201	89.301	88.901	89.201	89.201	89.701	89.701	89.701	89.201	89.601	90.501
>KF738843_1_Columbid_circovirus_isolate_PL102_complete_genome	90.301	90.601	91.301	91.301	90.401	89.901	89.201	89.101	89.101	89.001	90.701	90.101	90.401	89.901	88.901	89.301	88.901	87.801	87.801	87.801	87.801	87.901	87.801	88.001	89.301	89.201	88.401	90.001	90.201	88.901	90.701	90.701	90.501	89.701	89.301	90.001	90.701	90.501	89.901	90.201	89.601	89.201	89.201	89.901	89.901	90.001	89.501	91.001	91.201
>KX108800_1_Pigeon_circovirus_strain_GF104_GuangDong_2014_complete_genome	95.001	94.601	94.701	94.601	94.101	93.901	92.801	92.701	92.601	92.801	95.001	93.701	94.001	92.901	93.001	93.201	92.401	91.701	91.601	91.601	91.701	91.701	91.601	91.801	92.601	92.201	91.201	92.901	93.001	92.401	94.201	94.201	94.001	93.601	92.801	93.001	93.901	93.401	94.001	94.901	93.501	93.401	93.401	93.701	93.701	93.601	93.701	93.401	95.301
>KF738854_1_Columbid_circovirus_isolate_PL201_complete_genome	88.501	89.501	89.901	89.801	88.301	87.901	88.201	88.001	88.001	87.901	89.501	88.801	89.201	88.201	88.301	88.301	87.701	88.001	87.801	87.801	87.701	87.801	87.701	87.901	87.501	86.701	85.901	88.001	88.301	87.501	88.501	88.501	88.601	88.501	88.001	88.001	88.801	88.401	88.901	88.601	88.301	88.901	88.901	88.801	88.801	88.701	89.401	88.001	89.601
>MW656166_1_Pigeon_circovirus_isolate_TSPSwab6_4_complete_genome	89.001	90.501	90.701	90.601	89.001	88.501	88.501	88.301	88.301	88.601	90.201	89.501	90.001	89.001	88.801	88.901	88.301	88.901	88.001	88.201	88.201	88.201	88.101	88.301	88.401	87.301	86.601	88.801	89.001	88.301	89.301	89.301	89.401	89.301	88.801	88.601	89.401	88.901	89.301	89.301	89.101	89.401	89.401	89.301	89.301	89.301	89.801	88.601	90.601
>MW656165_1_Pigeon_circovirus_isolate_TSPSwab6_2_complete_genome	89.101	90.601	90.801	90.701	89.101	88.601	88.601	88.401	88.401	88.701	90.301	89.601	90.101	89.101	88.901	89.001	88.401	89.001	88.101	88.301	88.201	88.301	88.201	88.401	88.501	87.401	86.701	88.901	89.201	88.401	89.401	89.401	89.501	89.401	88.901	88.701	89.501	89.001	89.401	89.401	89.301	89.601	89.601	89.401	89.401	89.401	90.001	88.701	90.601
>MW656162_1_Pigeon_circovirus_isolate_TSP_swab6_complete_genome	89.101	90.601	90.801	90.701	89.101	88.601	88.601	88.401	88.401	88.701	90.301	89.601	90.101	89.101	88.901	89.001	88.401	89.001	88.101	88.301	88.201	88.301	88.201	88.401	88.501	87.401	86.701	88.901	89.201	88.401	89.401	89.401	89.501	89.401	88.901	88.701	89.501	89.001	89.401	89.401	89.201	89.601	89.601	89.401	89.401	89.401	90.001	88.801	90.601
>MW656164_1_Pigeon_circovirus_isolate_TSPSwab6_1_complete_genome	89.201	90.601	90.901	90.801	89.101	88.701	88.701	88.501	88.501	88.801	90.401	89.701	90.101	89.101	89.001	89.001	88.501	89.001	88.101	88.301	88.301	88.301	88.201	88.401	88.501	87.501	86.701	89.001	89.201	88.501	89.501	89.501	89.501	89.501	88.901	88.801	89.601	89.101	89.501	89.401	89.301	89.601	89.601	89.501	89.501	89.401	90.001	88.801	90.701
>MW656159_1_Pigeon_circovirus_isolate_TSP6_2118_complete_genome	89.201	90.601	90.801	90.701	89.101	88.601	88.601	88.401	88.401	88.701	90.301	89.601	90.101	89.101	88.901	89.001	88.401	89.001	88.101	88.301	88.201	88.301	88.201	88.401	88.501	87.401	86.701	88.901	89.201	88.501	89.401	89.401	89.501	89.401	88.901	88.701	89.501	89.001	89.401	89.401	89.201	89.601	89.601	89.401	89.401	89.401	90.001	88.701	90.601
>MW656153_1_Pigeon_circovirus_isolate_TSP6_1_complete_genome	89.101	90.501	90.801	90.701	89.001	88.601	88.601	88.401	88.401	88.701	90.301	89.601	90.001	89.001	88.901	88.901	88.501	89.001	88.101	88.301	88.301	88.301	88.201	88.401	88.401	87.401	86.601	88.901	89.201	88.401	89.401	89.401	89.501	89.401	88.901	88.801	89.601	89.101	89.401	89.301	89.301	89.601	89.601	89.401	89.401	89.301	90.101	88.801	90.601
>MW656156_1_Pigeon_circovirus_isolate_TSP6_8_complete_genome	89.101	90.501	90.801	90.701	89.001	88.601	88.601	88.401	88.401	88.701	90.301	89.601	90.001	89.001	88.901	88.901	88.501	88.901	88.001	88.201	88.201	88.201	88.101	88.301	88.401	87.401	86.601	89.001	89.301	88.501	89.401	89.401	89.501	89.401	89.001	88.801	89.601	89.201	89.401	89.301	89.401	89.601	89.601	89.401	89.401	89.301	90.101	88.701	90.601
>MW656158_1_Pigeon_circovirus_isolate_TSP6_10_complete_genome	89.101	90.501	90.701	90.601	89.001	88.501	88.501	88.301	88.301	88.601	90.201	89.501	90.001	89.001	88.801	88.901	88.401	88.901	88.001	88.201	88.101	88.201	88.101	88.301	88.401	87.301	86.601	89.001	89.401	88.601	89.301	89.301	89.601	89.301	89.001	88.701	89.501	89.201	89.301	89.301	89.301	89.501	89.501	89.401	89.401	89.401	90.001	88.701	90.601
>MW656155_1_Pigeon_circovirus_isolate_TSP6_6_complete_genome	89.101	90.501	90.801	90.701	89.001	88.601	88.601	88.401	88.401	88.701	90.301	89.601	90.001	89.001	88.901	88.901	88.401	88.901	88.001	88.201	88.201	88.201	88.101	88.301	88.501	87.401	86.601	89.001	89.301	88.501	89.401	89.401	89.601	89.401	88.901	88.701	89.501	89.201	89.401	89.301	89.301	89.601	89.601	89.501	89.501	89.401	90.001	88.801	90.601
>MW656160_1_Pigeon_circovirus_isolate_TSP8_1_complete_genome	89.101	90.501	90.701	90.601	89.001	88.501	88.501	88.301	88.301	88.601	90.201	89.501	90.001	89.001	88.801	88.901	88.401	88.901	88.001	88.201	88.101	88.201	88.101	88.301	88.401	87.301	86.601	89.001	89.301	88.601	89.301	89.301	89.501	89.301	88.901	88.701	89.501	89.101	89.301	89.301	89.201	89.501	89.501	89.401	89.401	89.401	90.001	88.701	90.601
>MW656157_1_Pigeon_circovirus_isolate_TSP6_9_complete_genome	89.201	90.601	90.801	90.701	89.101	88.601	88.601	88.401	88.401	88.701	90.301	89.601	90.101	89.101	88.901	89.001	88.401	89.001	88.101	88.301	88.201	88.301	88.201	88.401	88.501	87.401	86.701	89.001	89.301	88.601	89.401	89.401	89.601	89.401	88.901	88.701	89.501	89.101	89.401	89.401	89.201	89.601	89.601	89.501	89.501	89.501	90.001	88.801	90.601
>MW656161_1_Pigeon_circovirus_isolate_TSP8_10_complete_genome	89.101	90.501	90.801	90.701	89.001	88.601	88.601	88.401	88.401	88.701	90.301	89.601	90.001	89.001	88.901	88.901	88.501	89.001	88.101	88.301	88.301	88.301	88.201	88.401	88.501	87.401	86.601	89.001	89.201	88.501	89.401	89.401	89.501	89.401	88.801	88.801	89.601	89.101	89.401	89.301	89.201	89.601	89.601	89.501	89.501	89.401	90.101	88.901	90.601
>MW656154_1_Pigeon_circovirus_isolate_TSP6_2_complete_genome	89.101	90.501	90.801	90.701	89.001	88.601	88.601	88.401	88.401	88.701	90.301	89.601	90.001	89.001	88.901	88.901	88.501	89.001	88.101	88.301	88.301	88.301	88.201	88.401	88.501	87.401	86.601	89.001	89.201	88.501	89.401	89.401	89.501	89.401	88.801	88.801	89.601	89.101	89.401	89.301	89.201	89.601	89.601	89.501	89.501	89.401	90.101	88.901	90.601
>MW181978_1_Pigeon_circovirus_strain_YB1_SN_2018_complete_genome	90.001	90.801	91.601	91.501	89.901	89.401	89.401	89.101	89.101	89.301	90.801	90.301	90.701	89.201	89.301	89.501	88.701	89.001	88.701	88.701	88.601	88.701	88.601	88.801	88.801	88.001	87.201	89.101	89.401	88.501	90.001	90.001	90.001	89.901	89.201	89.001	89.801	89.601	90.101	90.201	89.501	90.001	90.001	90.001	90.001	89.501	89.701	89.501	91.301
>MW181985_1_Pigeon_circovirus_strain_LQ3_SN_2018_complete_genome	88.801	90.201	90.901	90.901	88.801	88.401	88.301	88.301	88.201	88.401	89.701	89.301	89.901	88.801	88.701	88.601	88.301	88.401	87.701	87.601	87.501	87.601	87.501	87.701	87.801	87.101	86.301	88.201	88.501	87.801	89.201	89.201	88.901	89.001	88.401	88.201	89.001	88.801	89.301	89.101	88.701	89.201	89.201	89.001	89.001	88.601	89.001	88.901	90.201
>KX108791_1_Pigeon_circovirus_strain_SF76_ShangHai_2014_complete_genome	90.401	92.001	93.201	93.001	90.701	90.201	90.801	90.501	90.501	89.701	92.001	91.101	91.801	90.601	90.701	91.201	89.401	90.001	89.801	89.801	89.701	89.801	89.701	89.901	89.901	89.101	88.201	90.001	90.101	89.501	91.001	91.001	90.901	91.701	90.501	90.201	90.901	90.701	90.801	90.801	90.701	90.701	90.701	90.801	90.801	90.901	91.001	90.801	92.001
>KX108797_1_Pigeon_circovirus_strain_JF3_JiangSu_2014_complete_genome	91.001	93.101	93.801	93.701	91.801	91.301	91.301	91.101	91.001	90.401	93.001	92.001	92.901	91.701	91.601	92.501	90.201	90.201	90.501	90.501	90.401	90.501	90.401	90.601	90.801	90.401	89.601	91.101	91.201	90.501	92.301	92.301	92.101	92.701	91.501	91.301	92.001	91.701	91.801	91.801	91.601	91.801	91.801	91.801	91.801	91.701	92.201	91.501	93.001
>EU840176_1_Columbid_circovirus_strain_SRK_US_01_complete_genome	86.901	87.601	87.801	87.801	86.801	86.601	85.901	85.901	86.101	86.101	87.401	86.601	87.501	86.501	86.701	86.401	86.501	86.001	85.301	85.401	85.401	85.401	85.301	85.501	85.801	85.201	84.301	85.801	86.001	85.401	87.101	87.101	86.801	87.001	86.501	86.301	87.001	86.901	87.301	87.001	86.501	86.801	86.801	86.401	86.401	86.701	87.301	86.301	87.701
>DQ915959_1_Columbid_circovirus_isolate_Dove_complete_genome	86.601	86.901	87.401	87.501	86.201	86.201	86.401	86.101	86.201	85.401	87.001	86.101	87.201	86.101	86.401	85.701	86.201	87.301	87.001	87.101	87.101	87.101	87.001	87.201	85.101	84.401	83.601	85.101	85.401	84.501	86.301	86.301	86.201	86.401	85.501	85.801	86.401	85.901	86.801	87.101	85.901	86.001	86.001	86.001	86.001	86.401	86.201	85.901	87.401
>MF136689_1_Pigeon_circovirus_strain_PiCV_P13_AUS_complete_genome	87.201	87.301	87.901	88.001	86.801	86.701	86.601	86.301	86.501	85.901	87.501	86.801	87.601	86.601	86.901	86.201	87.101	89.001	88.401	88.301	88.301	88.401	88.401	88.501	85.801	85.001	84.101	85.701	85.801	85.201	86.901	86.901	86.801	86.801	86.001	86.501	87.001	86.501	87.201	87.601	86.601	86.401	86.401	86.701	86.701	87.001	87.001	86.301	88.001
>LC035390_1_Pigeon_circovirus_DNA_complete_genome_strain_PiCV_Japan_2_2010	85.501	86.501	86.501	86.701	85.701	85.501	84.901	85.101	85.001	85.201	86.001	85.201	86.301	84.801	85.901	85.201	84.801	85.301	84.601	84.601	84.601	84.601	84.501	84.701	84.301	83.901	83.201	84.201	84.401	84.201	85.501	85.501	85.401	85.501	85.301	84.801	85.401	85.101	85.801	85.901	85.501	86.201	86.201	85.601	85.601	85.201	85.701	84.701	86.401
>MW181972_1_Pigeon_circovirus_strain_DFSM2_QH_2018_complete_genome	86.801	87.401	87.801	87.901	86.601	86.101	86.301	86.401	86.601	86.201	87.101	86.601	87.501	86.201	87.201	86.301	86.101	86.201	85.401	85.401	85.401	85.501	85.401	85.601	85.801	85.101	84.201	85.701	85.901	85.001	86.801	86.801	86.801	87.101	86.001	85.901	86.601	86.101	86.301	86.301	86.001	86.701	86.701	86.401	86.401	86.201	86.201	86.701	87.601
>MW181971_1_Pigeon_circovirus_strain_DFSM1_QH_2018_complete_genome	86.801	87.401	87.801	87.901	86.601	86.101	86.301	86.401	86.601	86.201	87.101	86.601	87.501	86.201	87.201	86.301	86.101	86.201	85.401	85.401	85.401	85.501	85.401	85.601	85.801	85.101	84.201	85.701	85.901	85.001	86.801	86.801	86.801	87.101	86.001	85.901	86.601	86.101	86.301	86.301	86.001	86.701	86.701	86.401	86.401	86.201	86.201	86.701	87.601
[truncated: 322 more columns]
